# Supplementary material
Source: MDPI journal article supplement (https://www.mdpi.com/2079-6447/2/1/1)
Supplement: s1 [file s1]

# Andy Warhol and His Amazing Technicolor Shoes: Characterizing the Synthetic Dyes found in Dr. Ph. Martin's Synchromatic Transparent Watercolors and used in *À la recherche du shoe perdu*

Abed Haddad<sup>1\*</sup>, Toni-Nakie-Miller<sup>2</sup>, Josephine Jenks<sup>3</sup>, Glen Kowach<sup>2,4</sup>

1. The David Booth Conservation Department, The Museum of Modern Art, 11 West 53<sup>rd</sup> Street, New York, 10019 NY, USA
2. Chemistry Department, The City College of New York, 160 Convent Avenue New York, NY 10031
3. The Conservation Center at The Institute of Fine Arts of New York University, The Stephen Chan House 14 East 78<sup>th</sup> Street New York, NY 10075
4. Ph.D. Program in Chemistry, The Graduate Center, City University of New York, 365 5<sup>th</sup> Avenue NY 10016

## Supplementary Materials

|                                                                                                                                                                 |       |
|-----------------------------------------------------------------------------------------------------------------------------------------------------------------|-------|
| <b>S1.1-38</b> Fingerprint-region $\mu$ -FTIR spectra and UV-Vis spectra<br>for each color.....                                                                 | 2-21  |
| <b>S2.</b> TLC Plates developed for TLC-SERS.....                                                                                                               | 22-28 |
| <b>S3.1-16</b> Individual SERS spectrum per dye identified with the<br>technique.....                                                                           | 29-32 |
| <b>S4.</b> Dr. Ph. Martin's Synchromatic Transparent Watercolors<br>used in <i>À la recherche du shoe perdu</i> (MoMA) by reflectance<br>spectrophotometry..... | 33    |

Figure S1.1 Beige

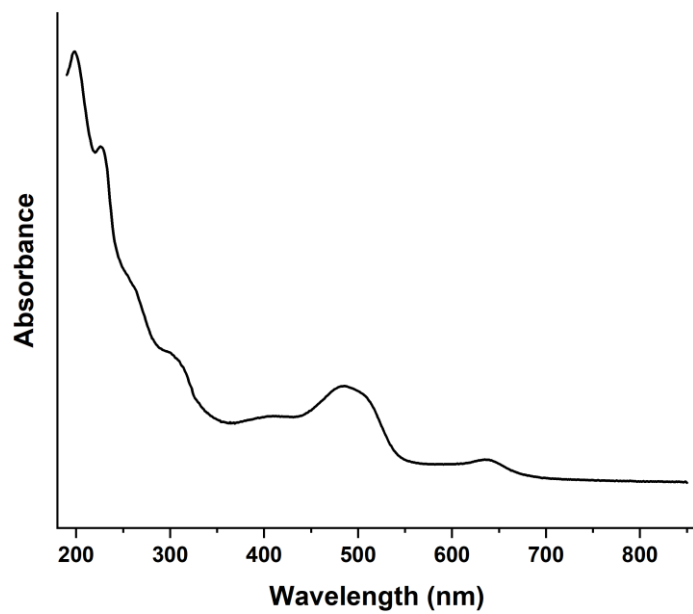

UV-Vis

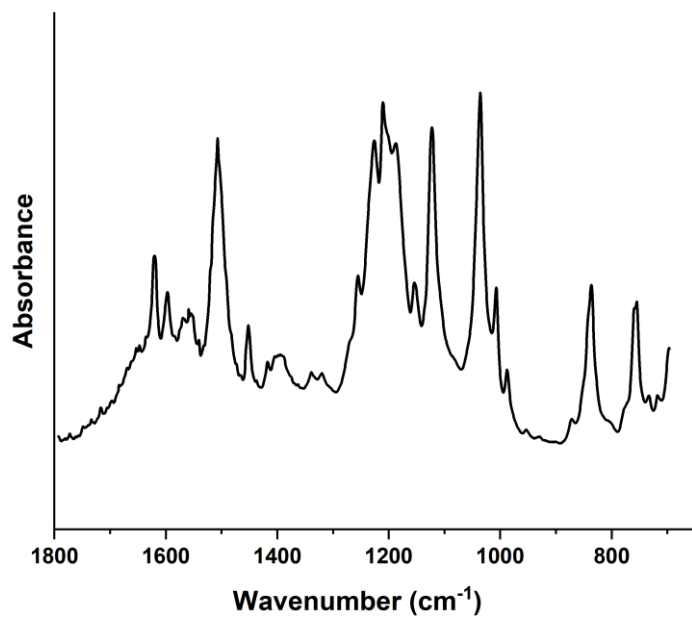

$\mu$ -FTIR

Figure S1.2 Black

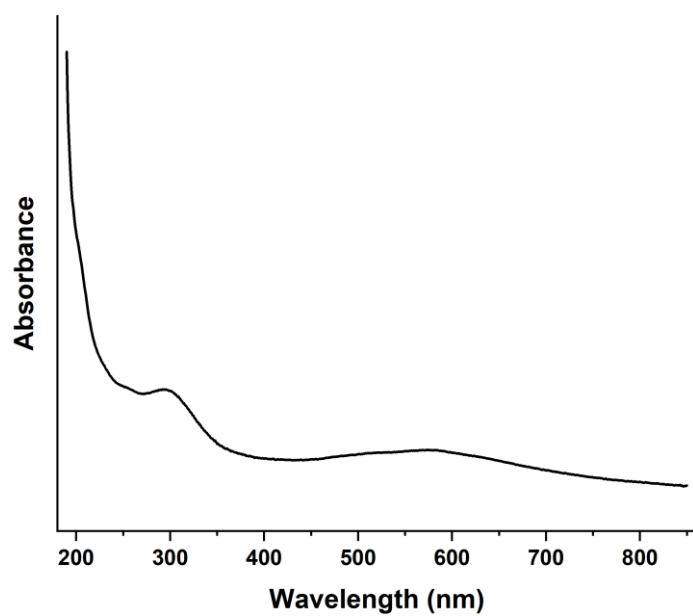

UV-Vis

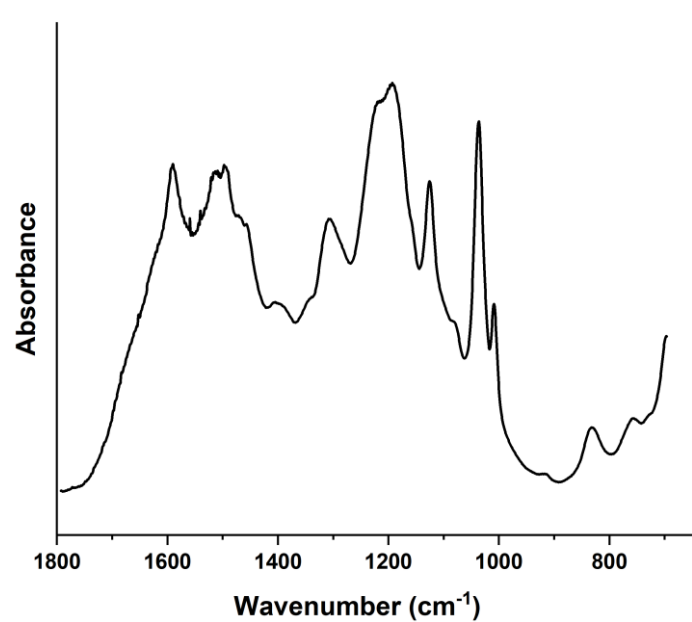

$\mu$ -FTIR

Figure S1.3 Bluish Black

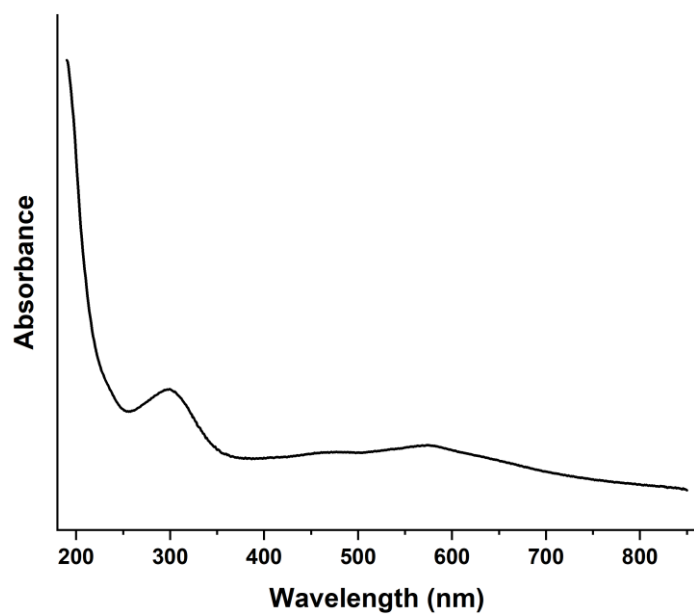

UV-Vis

Figure S1.4 Burnt Sienna

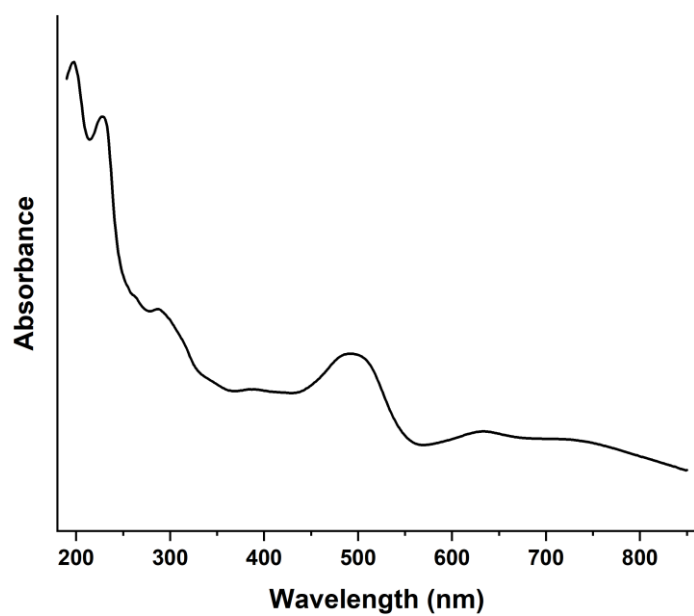

UV-Vis

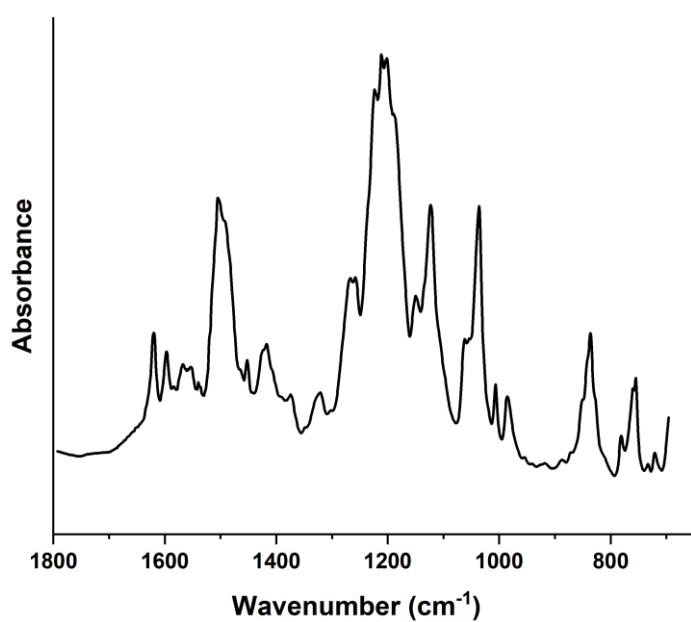

$\mu$ -FTIR

Figure S1.5 Cadmium

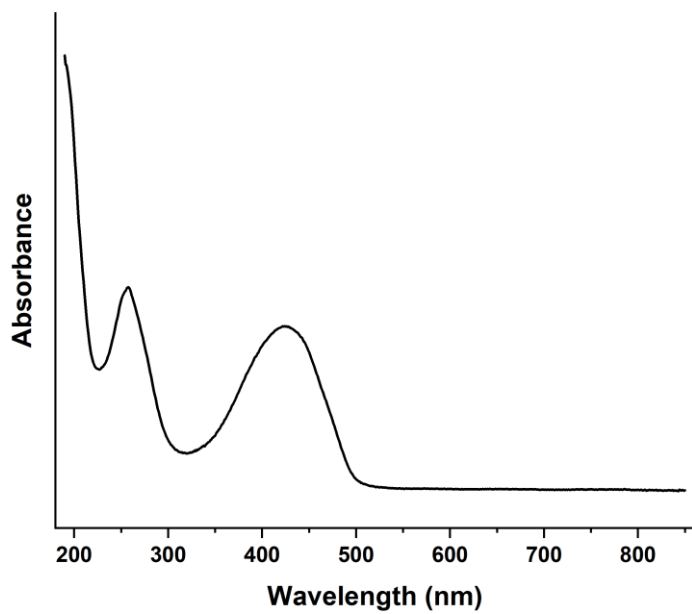

UV-Vis

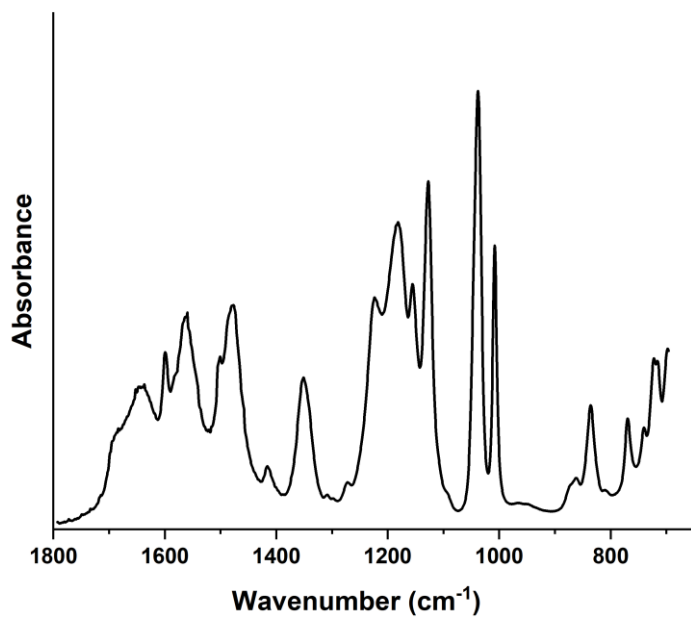

μ-FTIR

Figure S1.6 Cadmium Orange

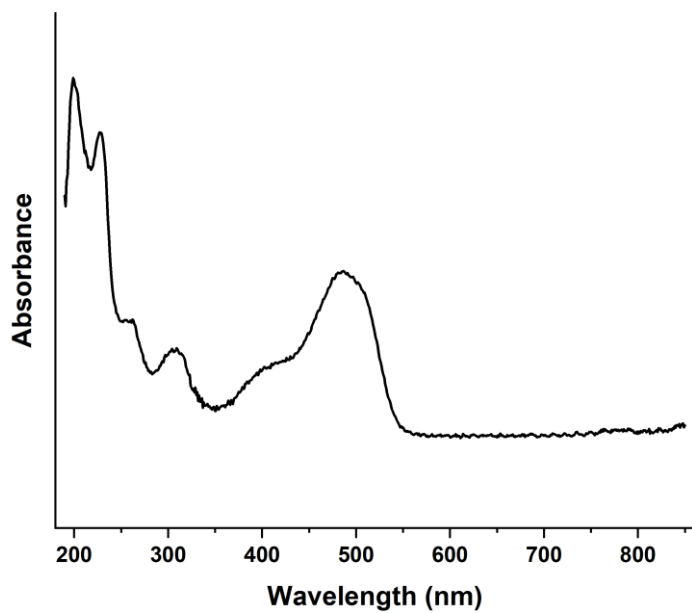

UV-Vis

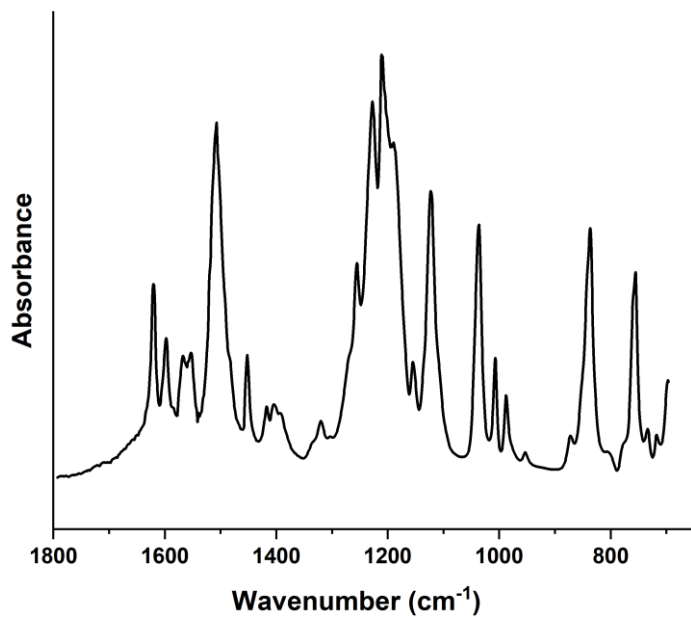

μ-FTIR

Figure S1.7 Carmine

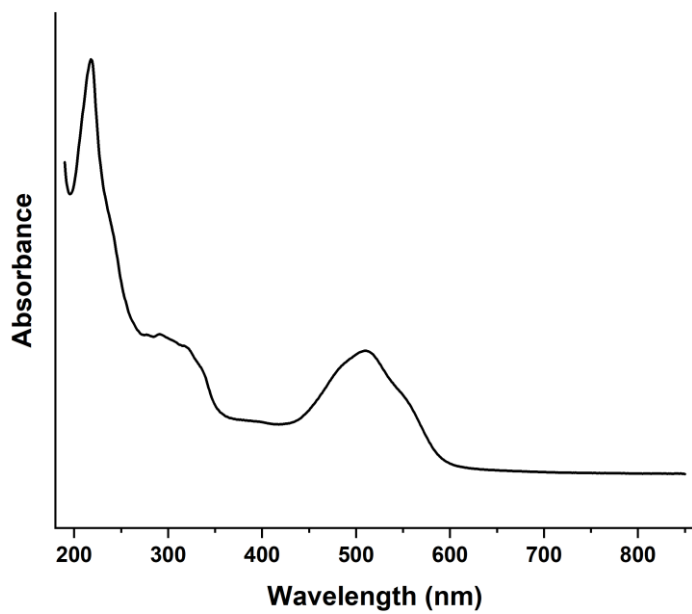

UV-Vis

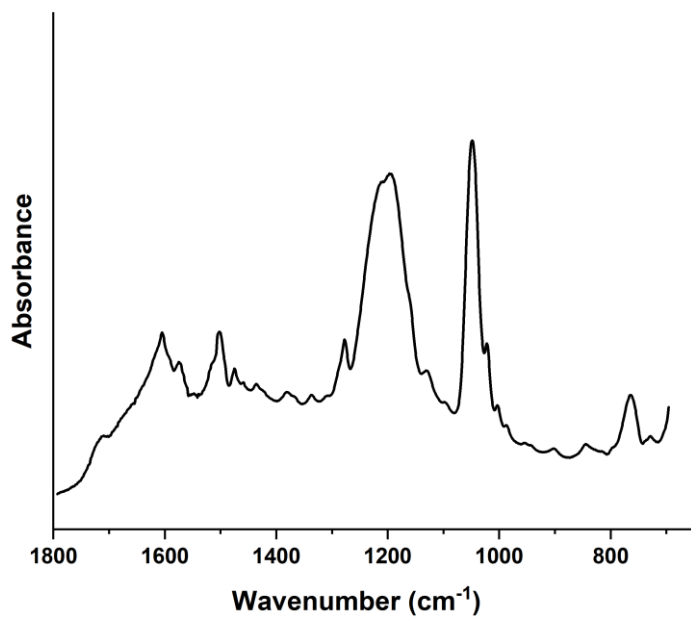

μ-FTIR

Figure S1.8 Cerise

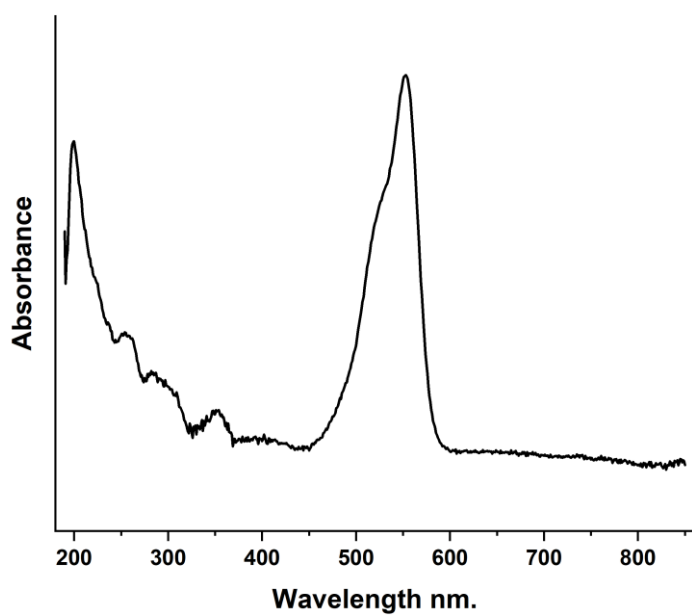

UV-Vis

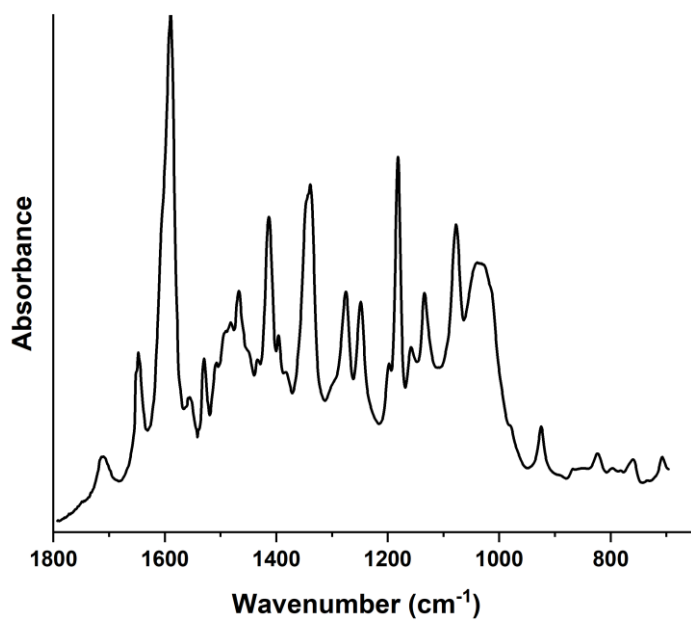

μ-FTIR

Figure S1.9 Cerulean Blue

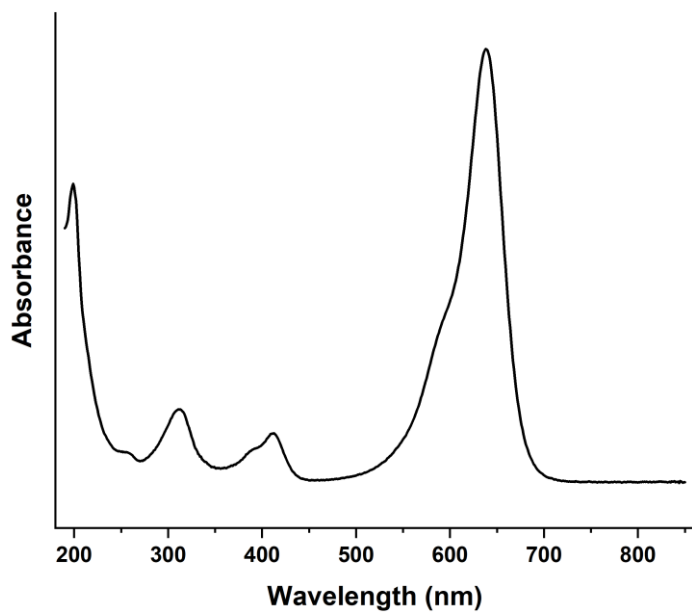

UV-Vis

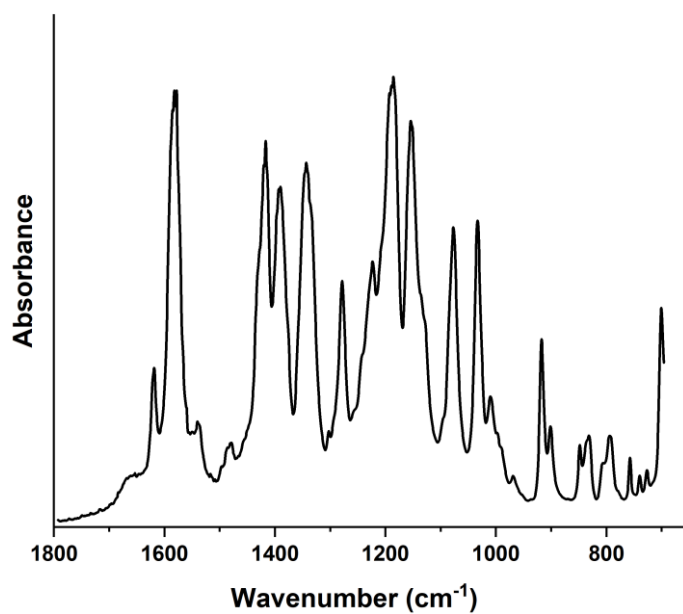

μ-FTIR

Figure S1.10 Chrome Yellow

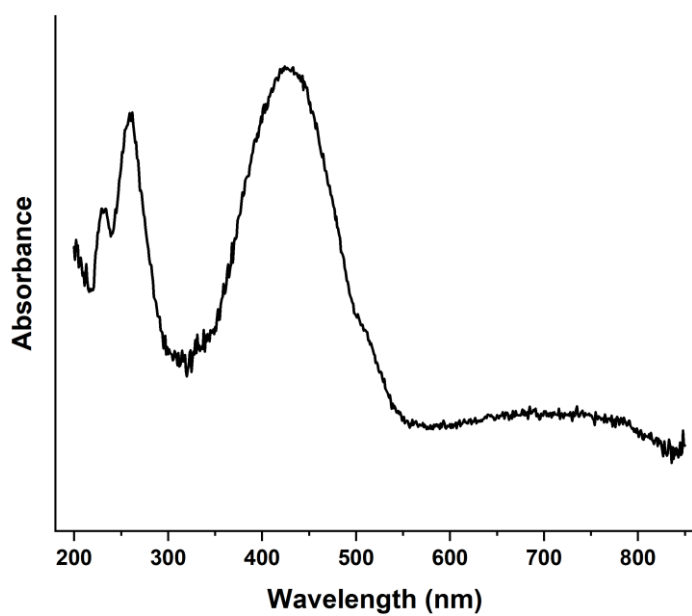

UV-Vis

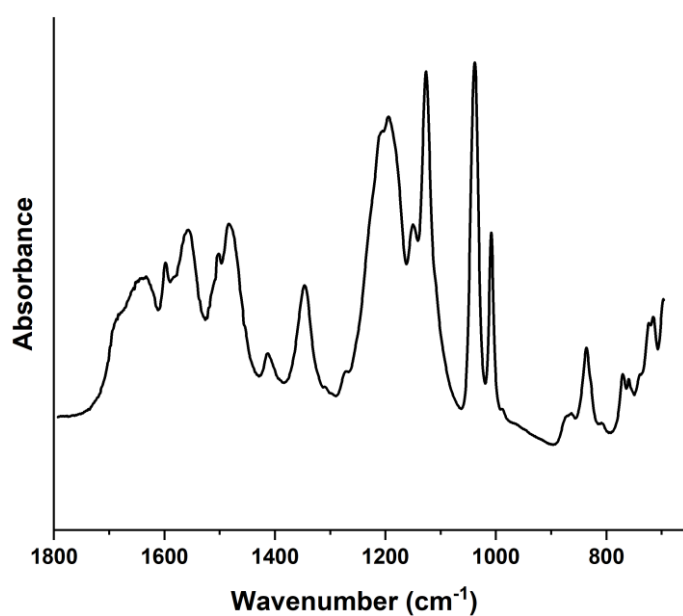

μ-FTIR

Figure S1.11 Dark Gray

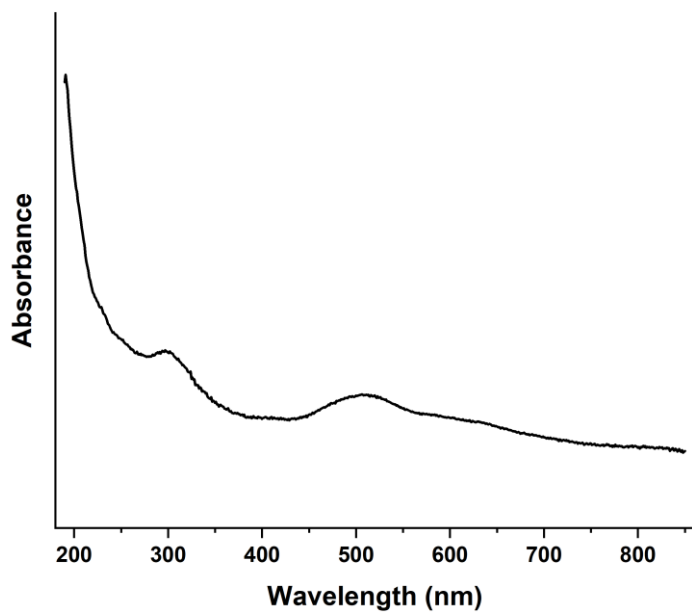

UV-Vis

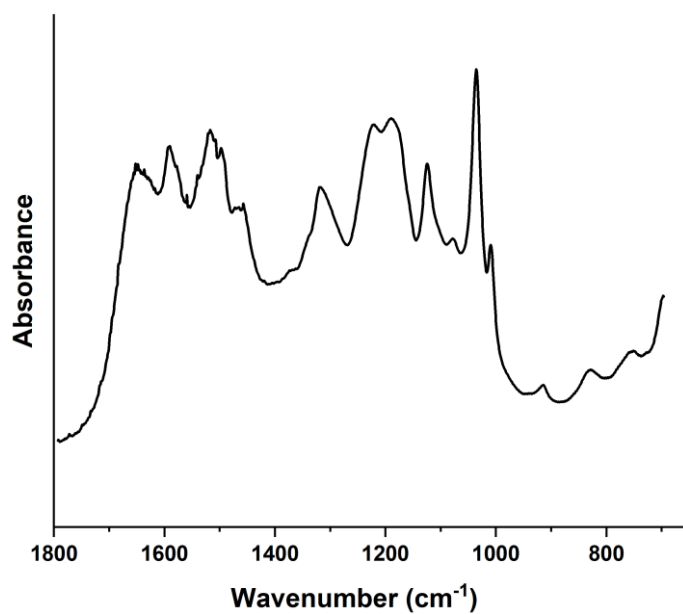

$\mu$ -FTIR

Figure S1.12 Emerald

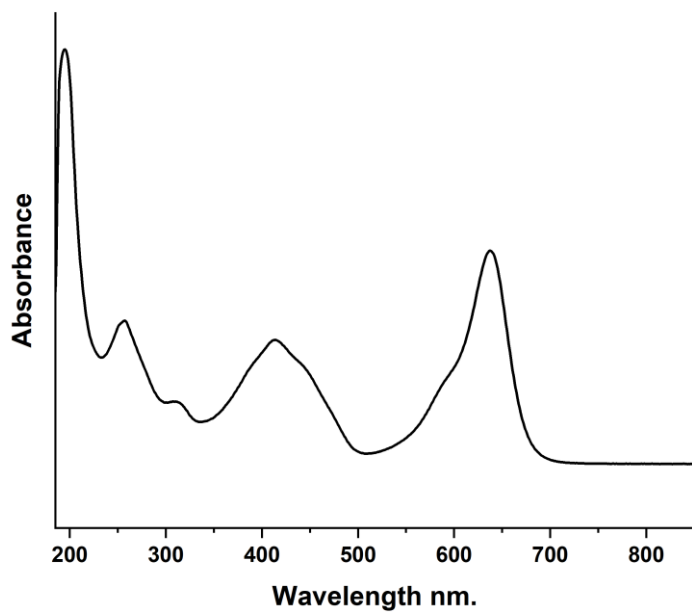

UV-Vis

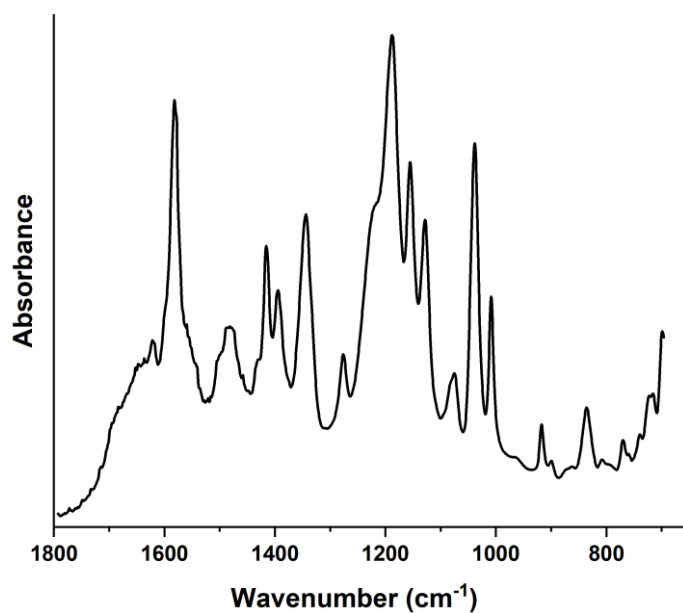

$\mu$ -FTIR

Figure S1.13 Hooker's Green

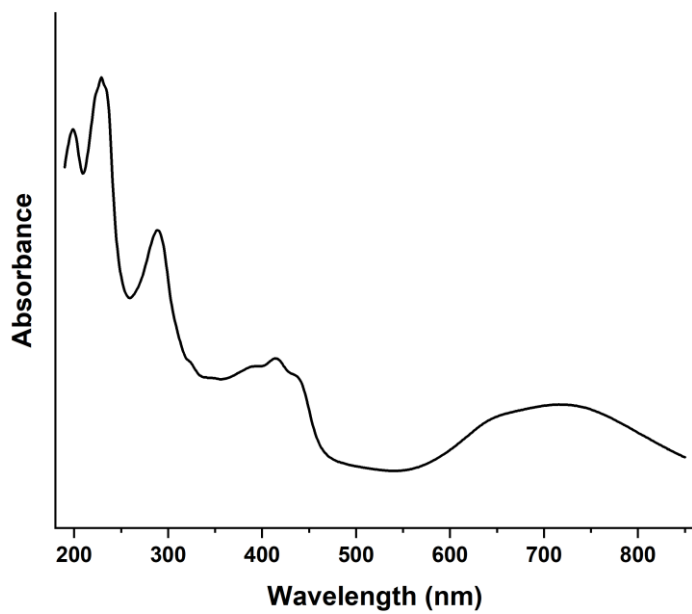

UV-Vis

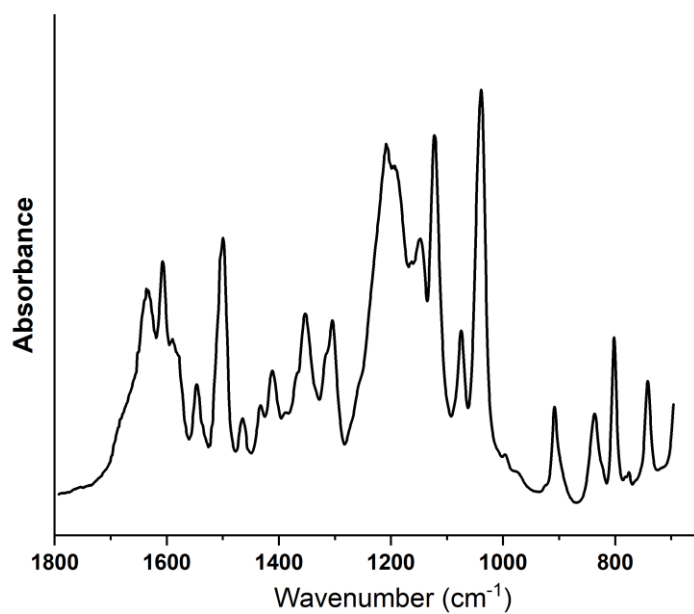

$\mu$ -FTIR

Figure S1.14 Lake

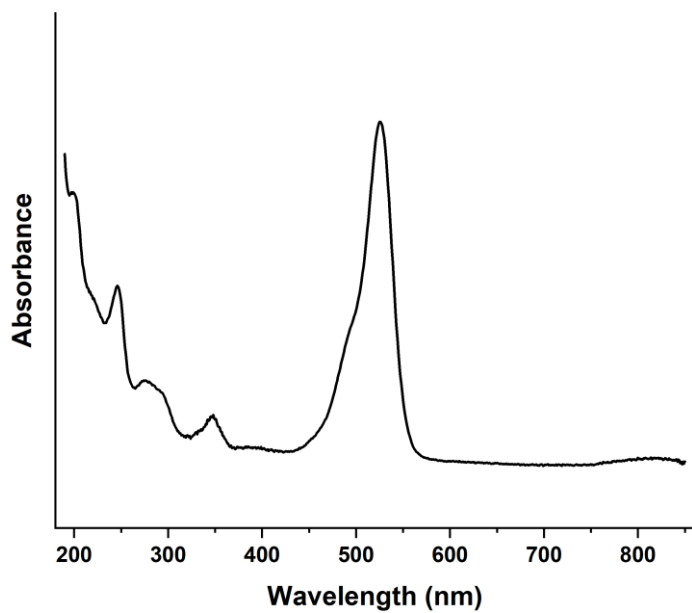

UV-Vis

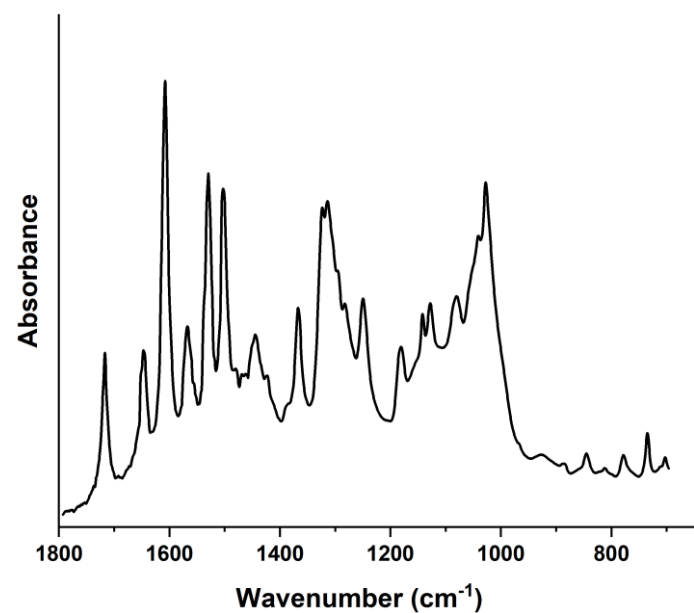

$\mu$ -FTIR



Figure S1.15 Lemon Yellow

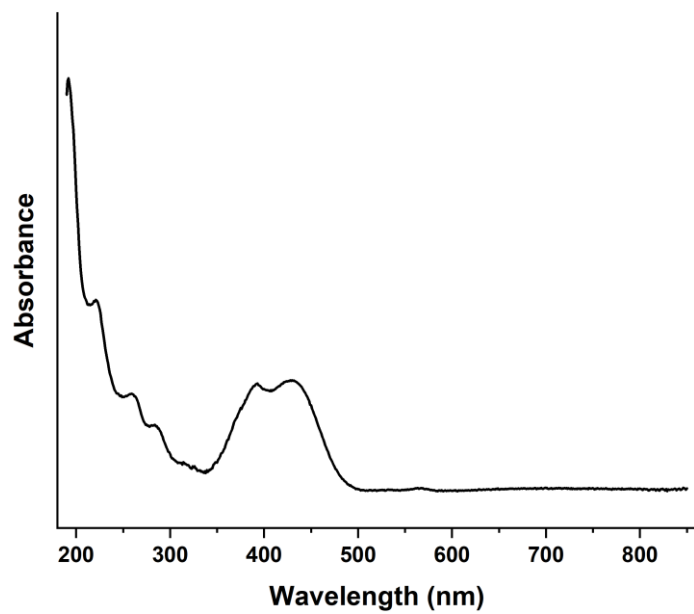

UV-Vis

Figure S1.16 Light Gray

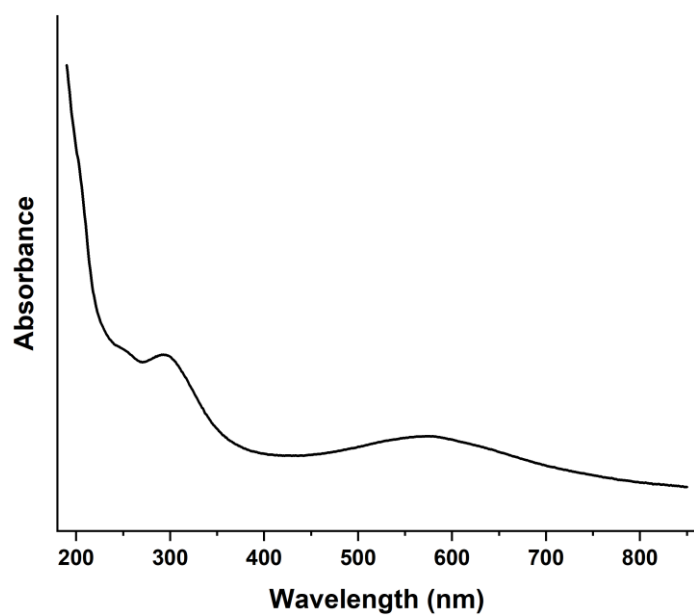

UV-Vis

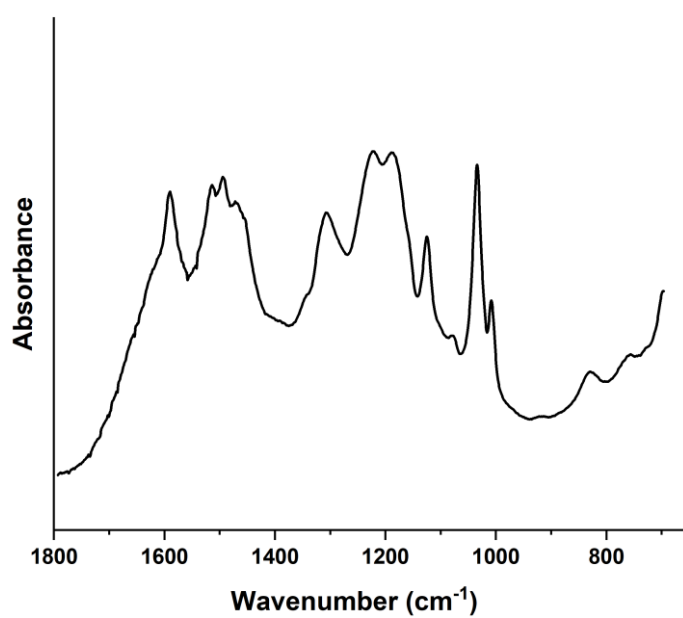

$\mu$ -FTIR

Figure S1.17 Light Brown

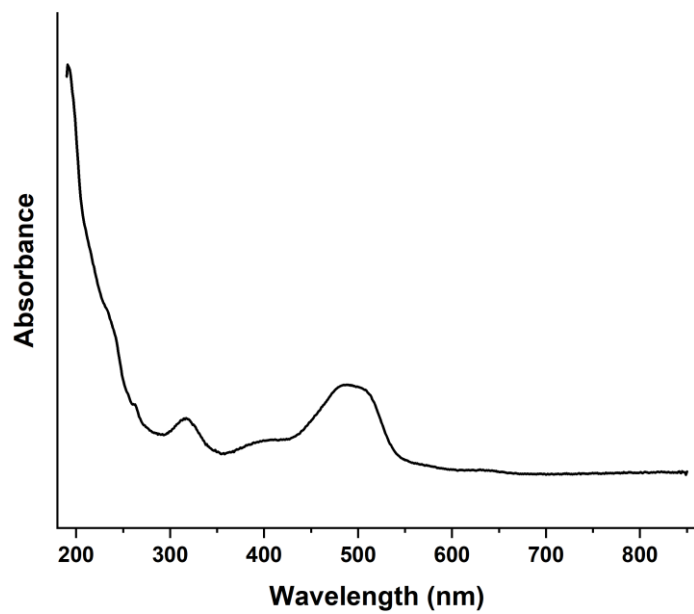

UV-Vis

Figure S1.18 Magenta

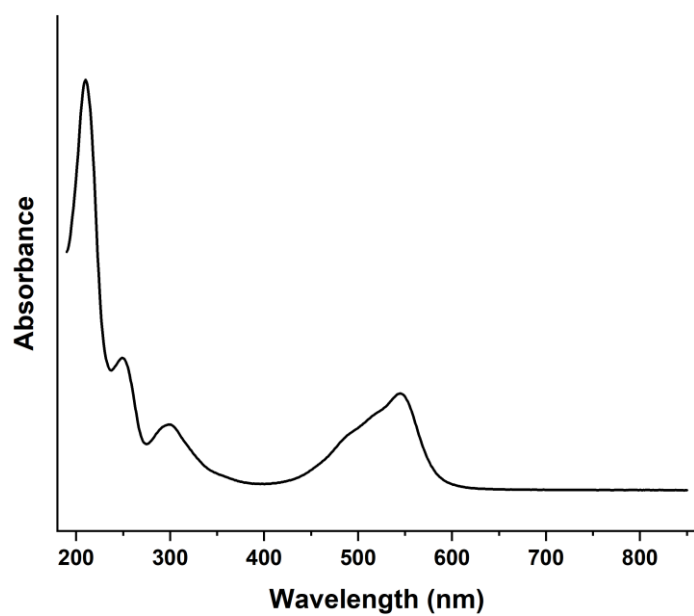

UV-Vis

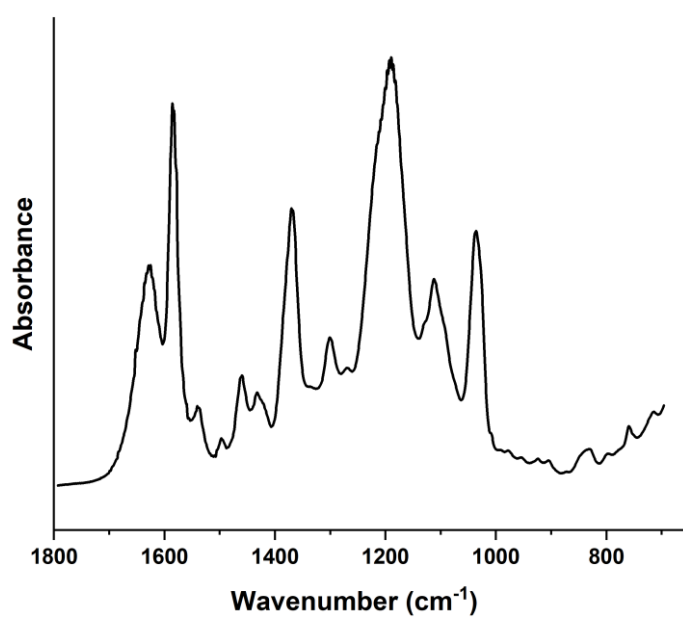

$\mu$ -FTIR

Figure S1.19 Medium Gray

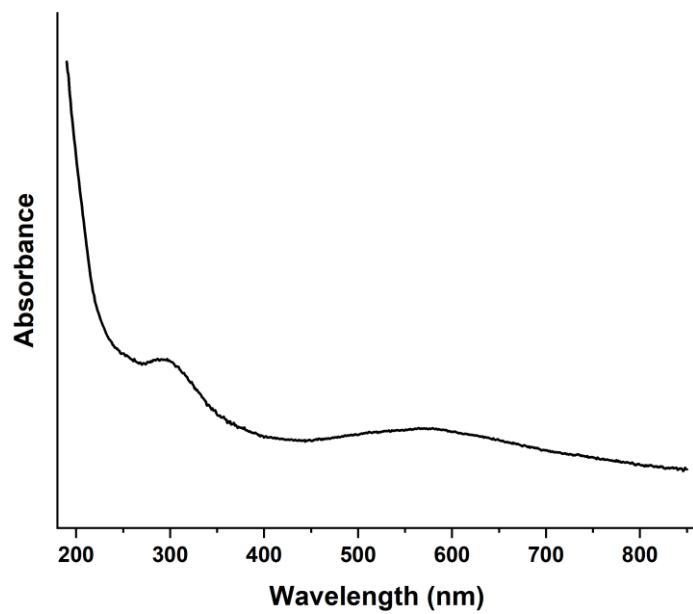

UV-Vis

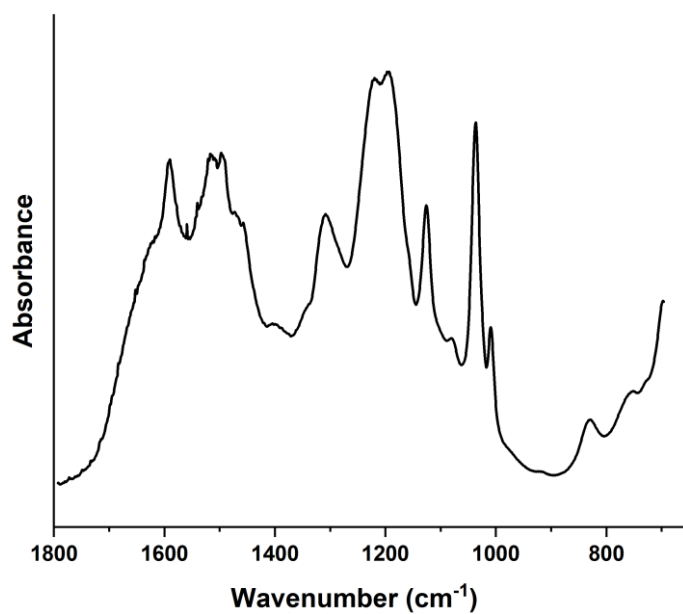

$\mu$ -FTIR

Figure S1.20 Nile Green

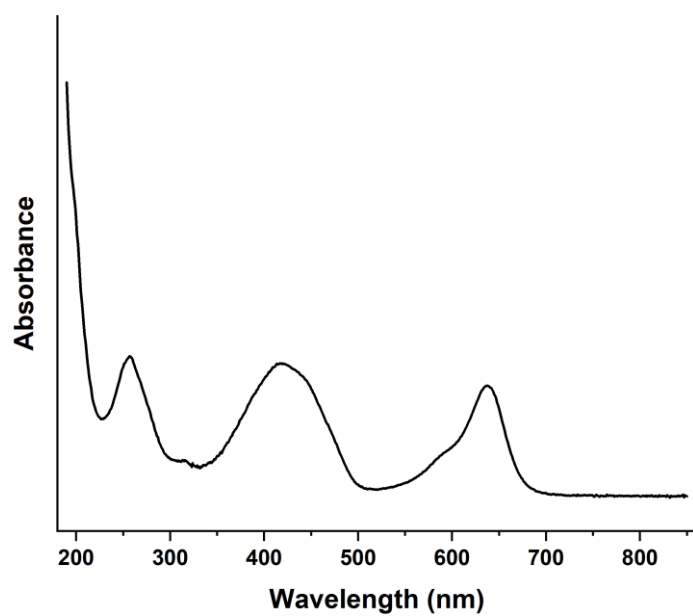

UV-Vis

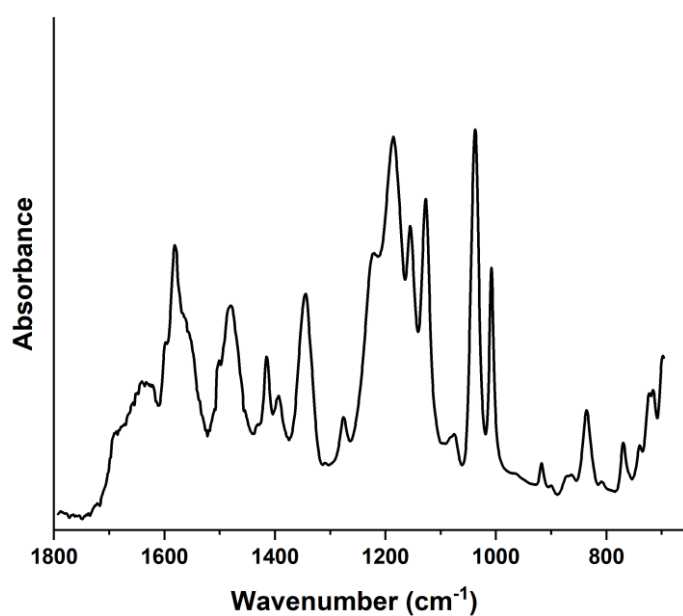

$\mu$ -FTIR

Figure S1.21 Olive Green

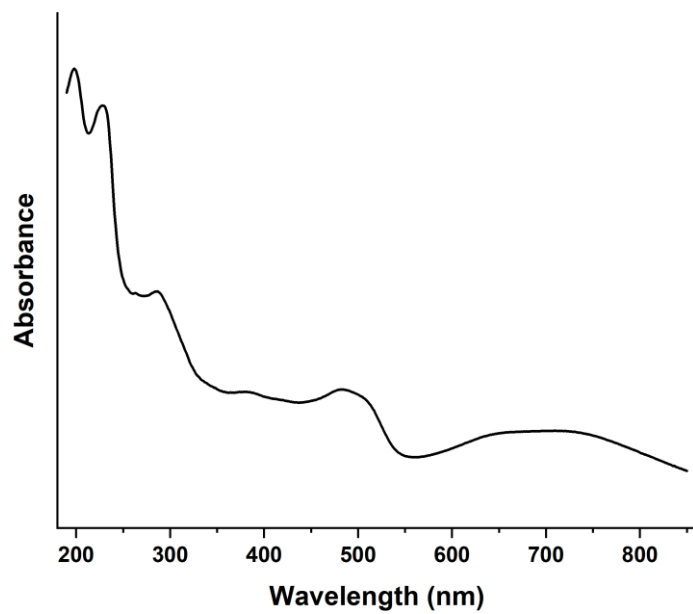

UV-Vis

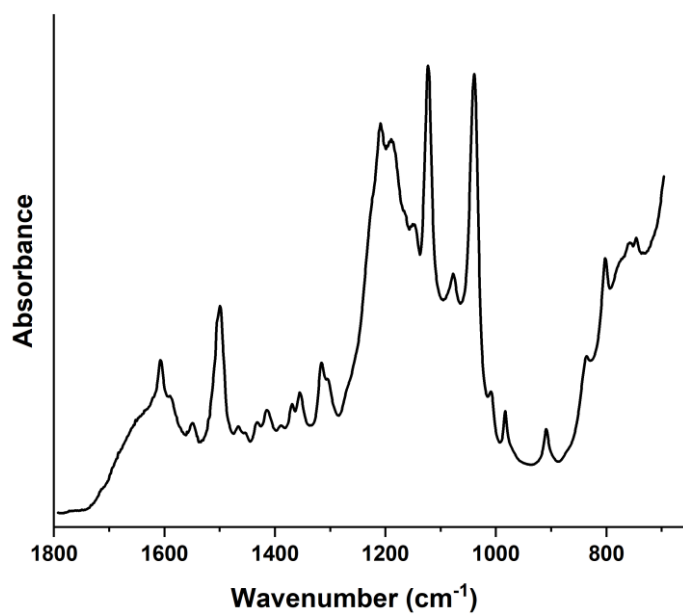

$\mu$ -FTIR

Figure S1.22 Orange

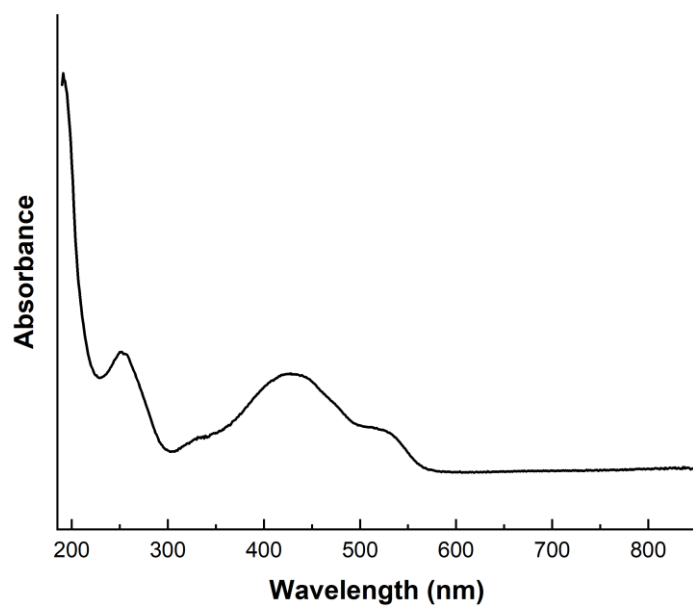

UV-Vis

Figure S1.23 Payne's Gray

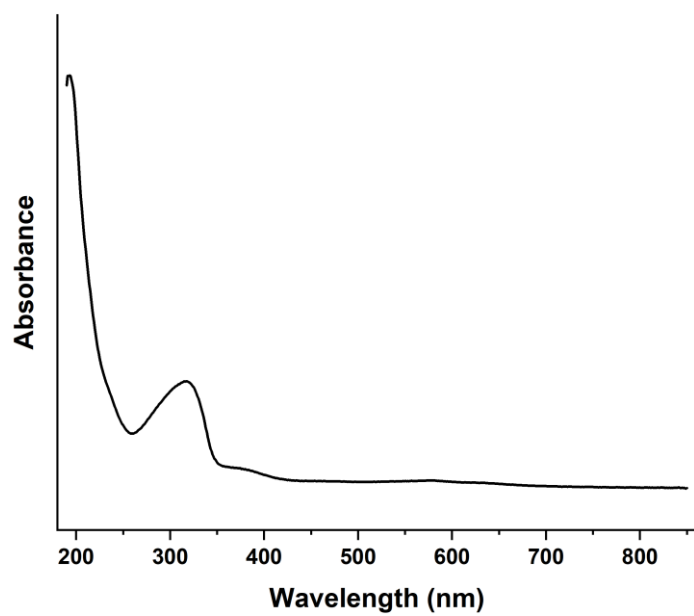

UV-Vis

Figure S1.24 Prussian Blue

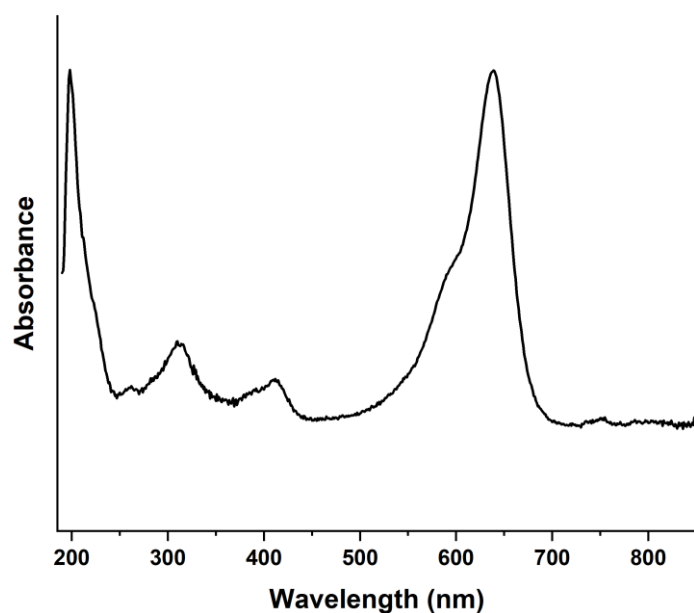

UV-Vis

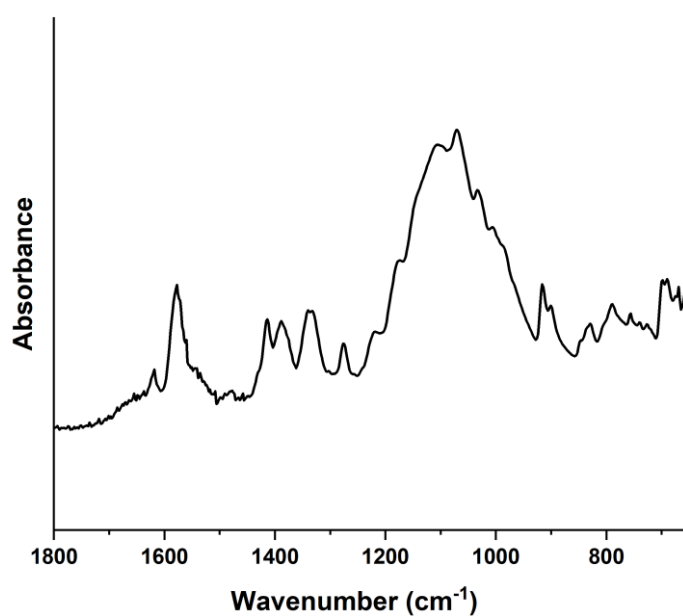

μ-FTIR

**Figure S1.25 Purple**

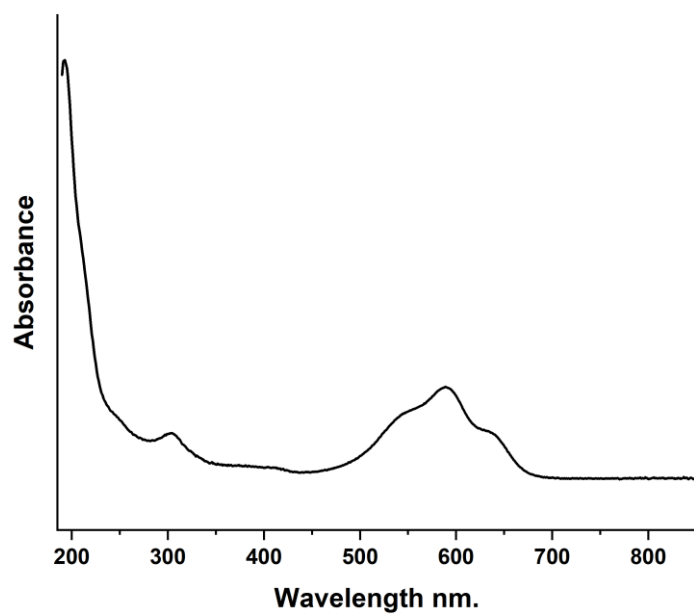

**UV-Vis**

**Figure S1.26 Reddish Brown**

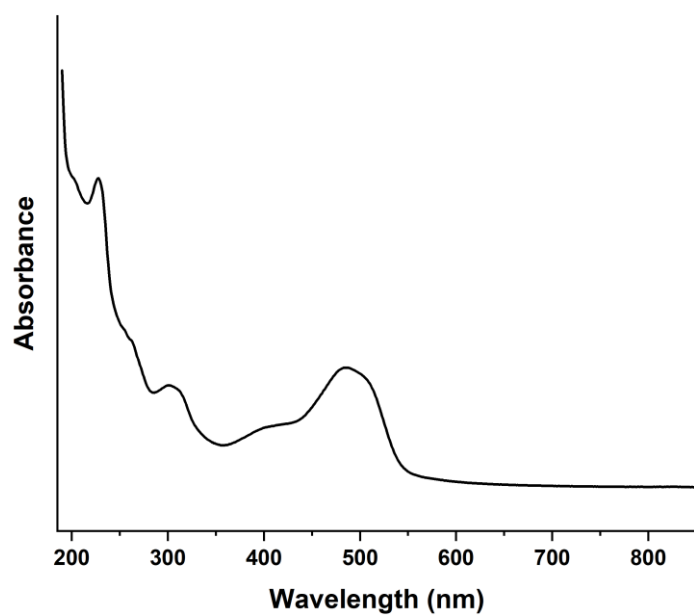

**UV-Vis**

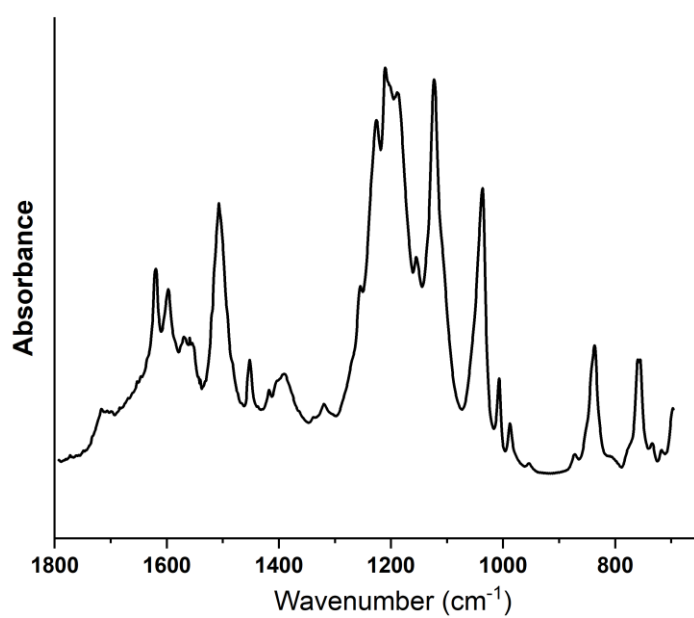

**$\mu$ -FTIR**

Figure S1.27 Rose Carthame

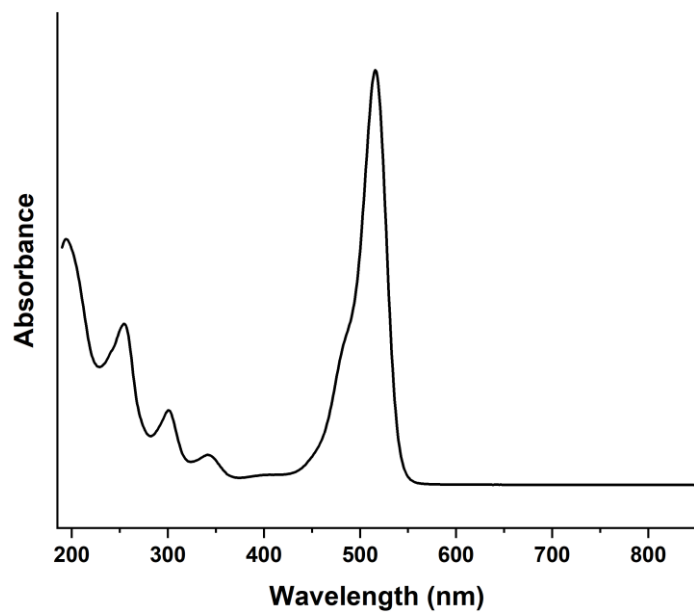

UV-Vis

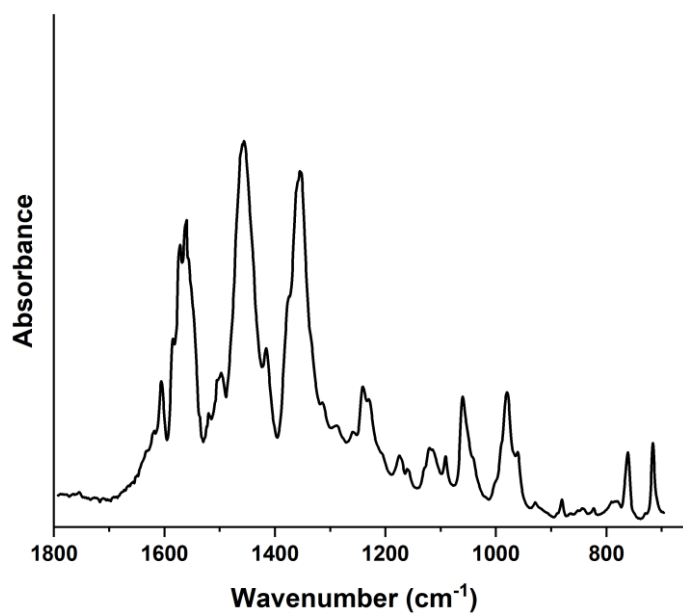

μ-FTIR

Figure S1.28 Rose Madder

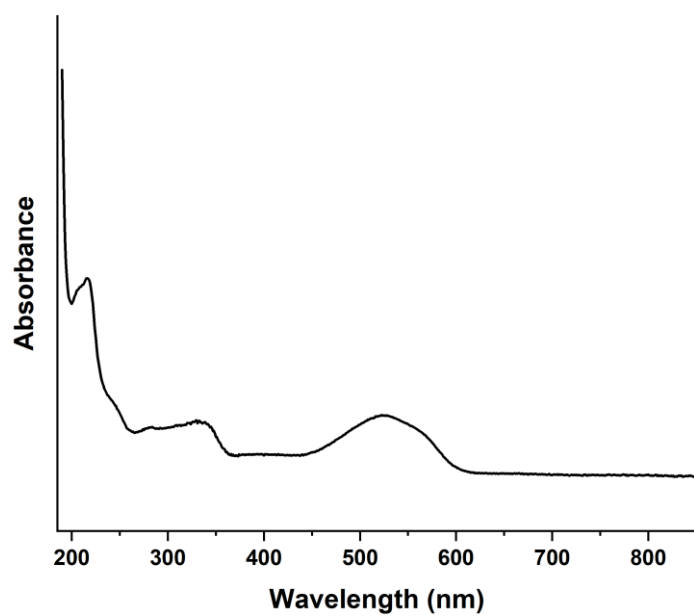

UV-Vis

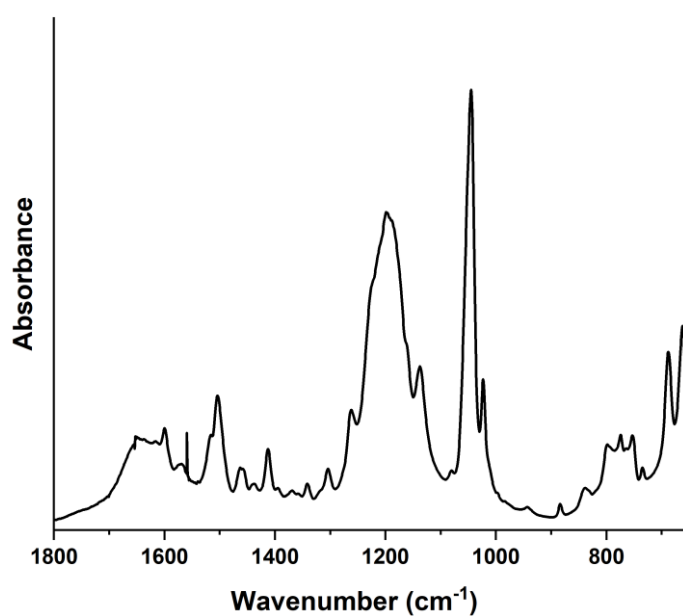

μ-FTIR

Figure S1.29 Scarlet

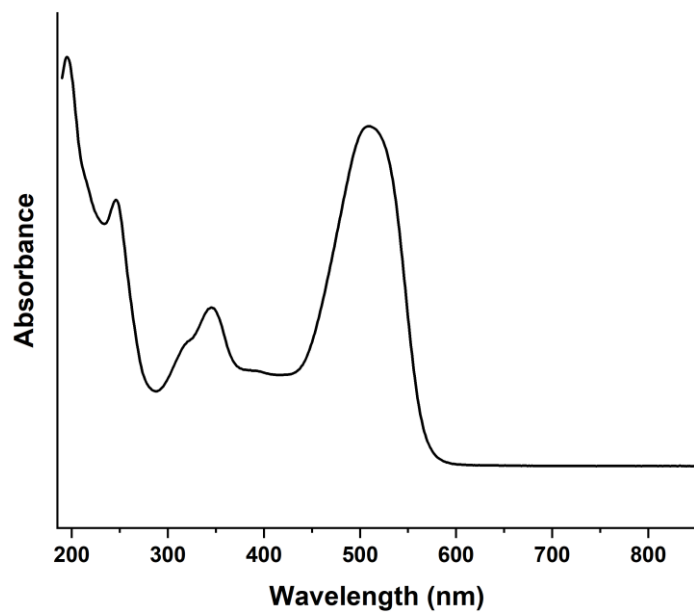

UV-Vis

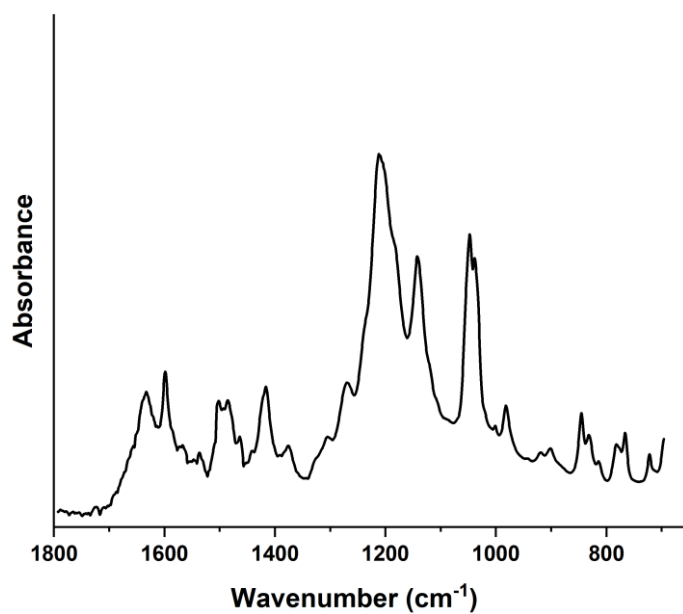

$\mu$ -FTIR

Figure S1.30 Sepia

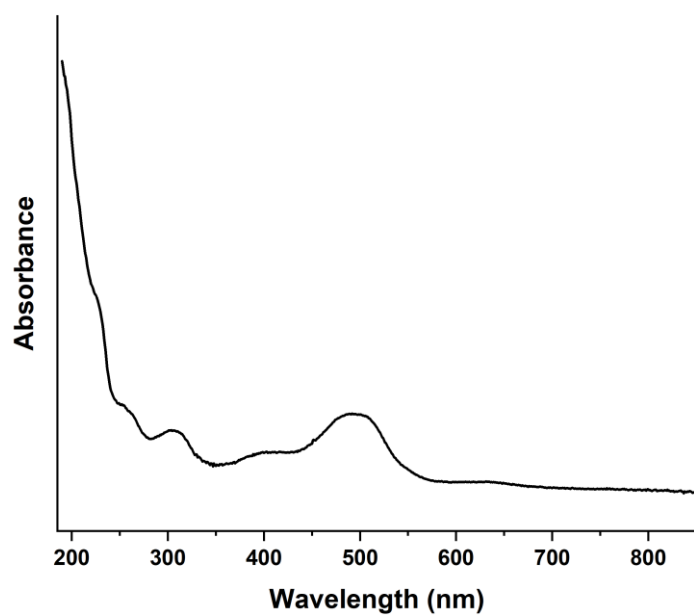

UV-Vis

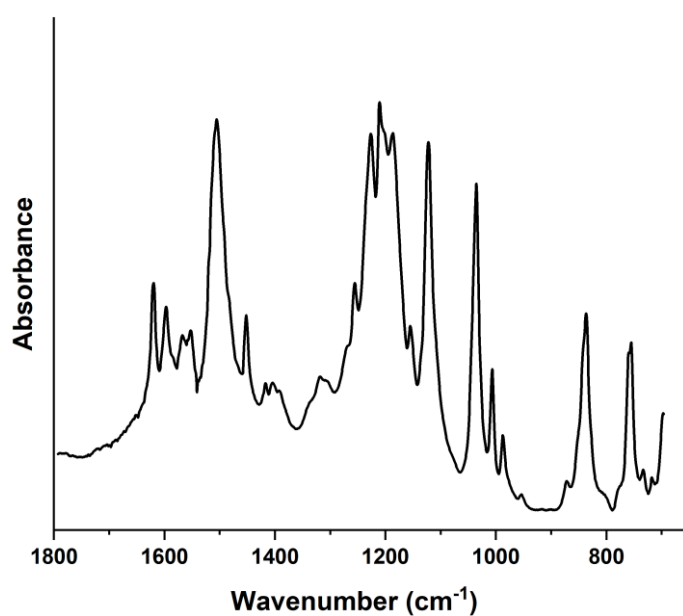

$\mu$ -FTIR



Figure S1.31 Stone Gray

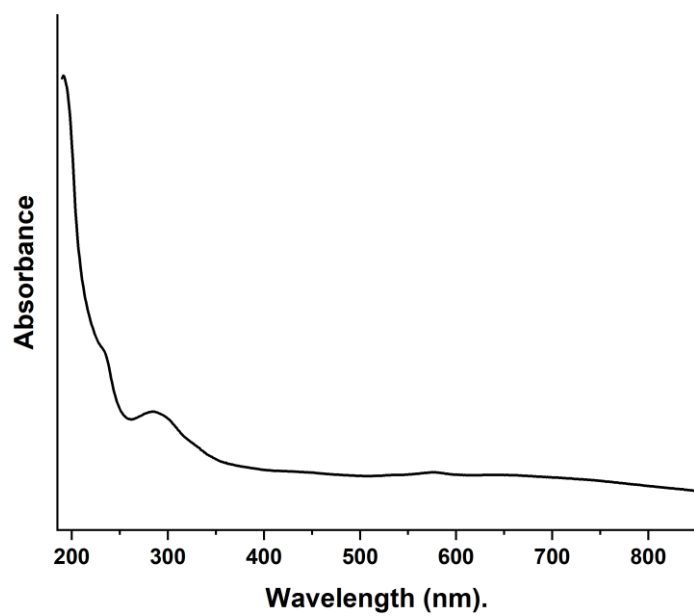

UV-Vis

Figure S1.32 Turquoise Blue

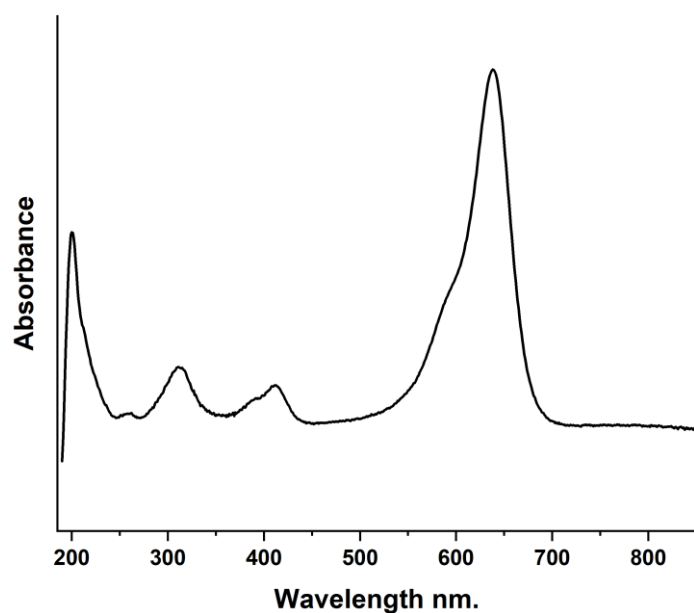

UV-Vis

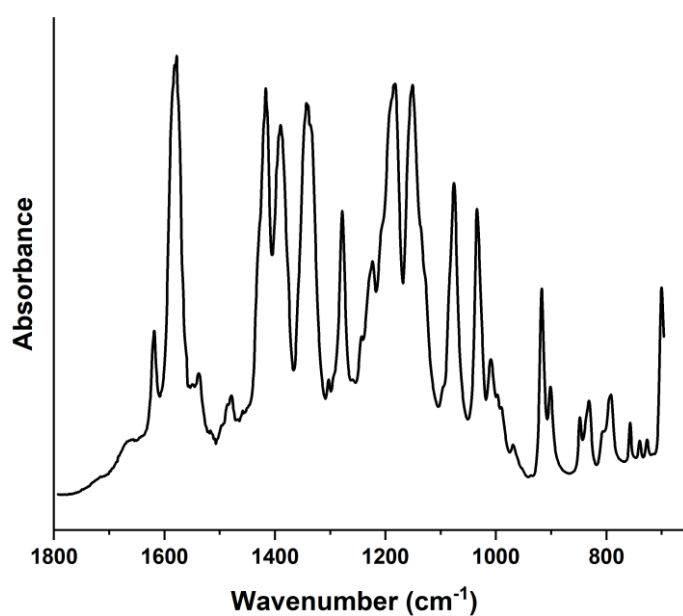

$\mu$ -FTIR

Figure S1.33 Ultramarine

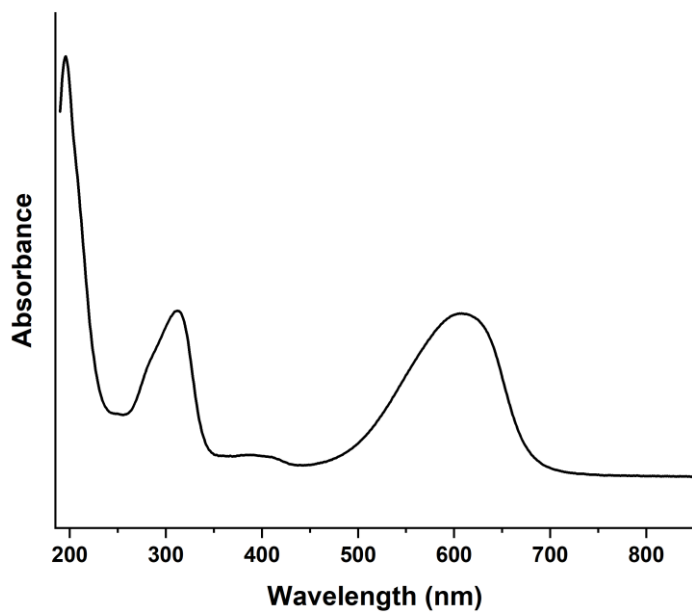

UV-Vis

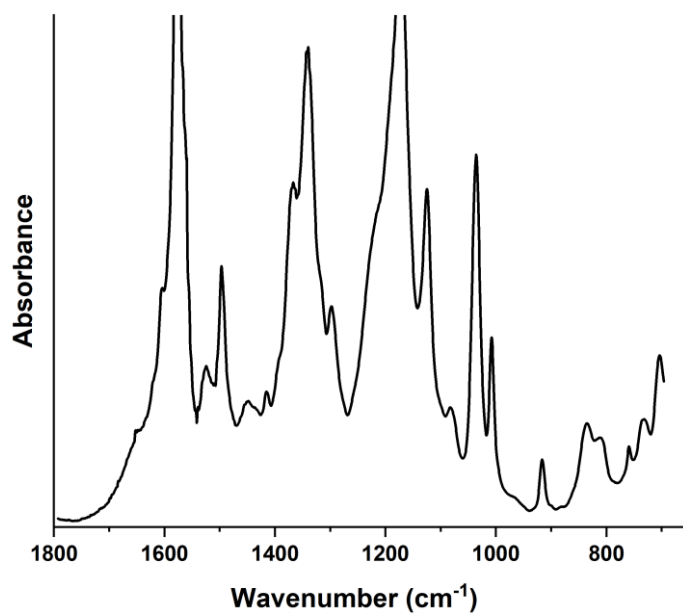

$\mu$ -FTIR

Figure S1.34 Van Dyke Brown

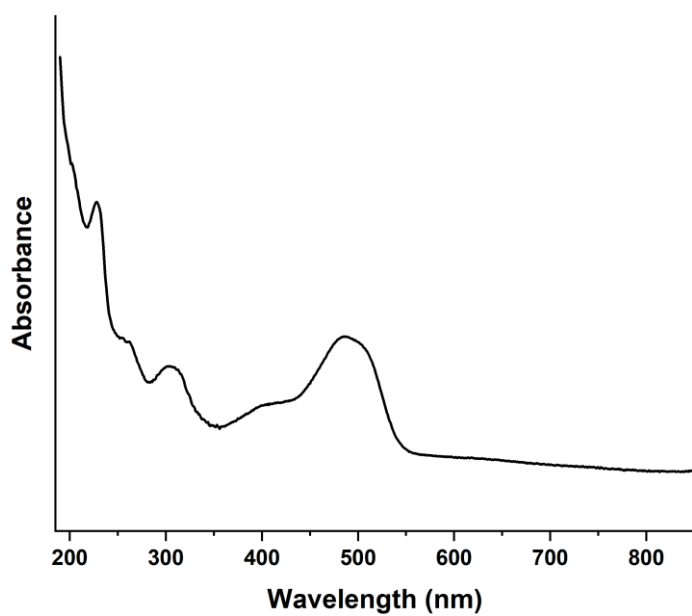

UV-Vis

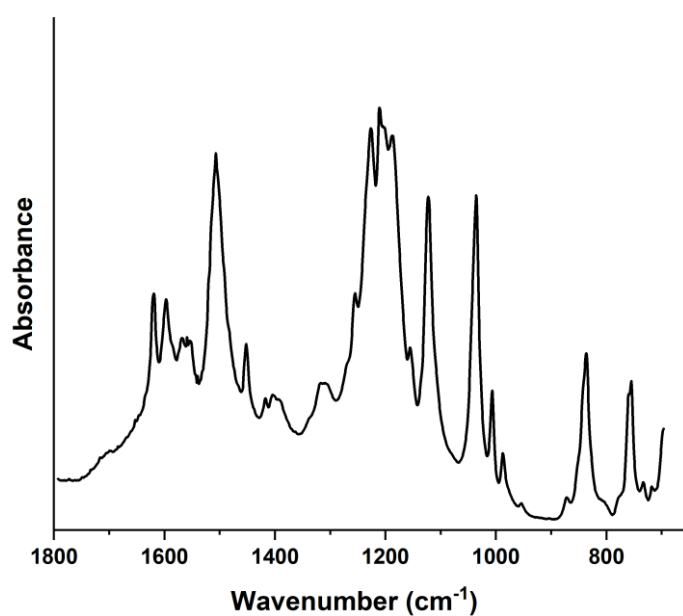

$\mu$ -FTIR

Figure S1.35 Vermilion

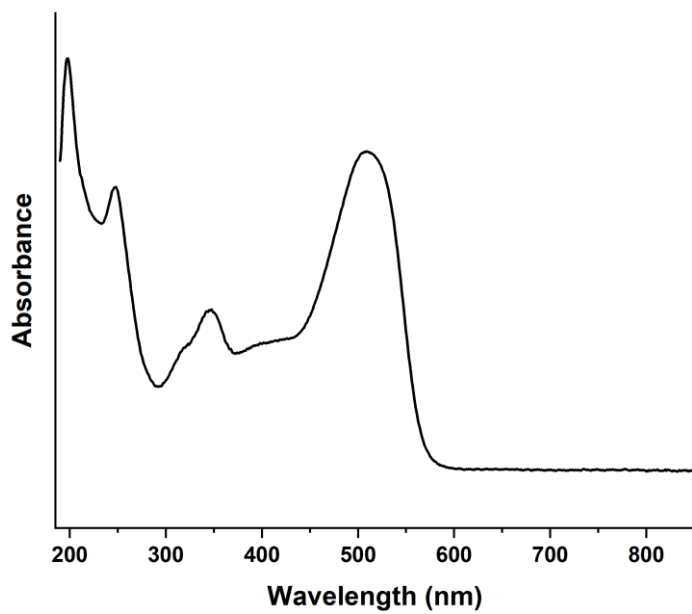

UV-Vis

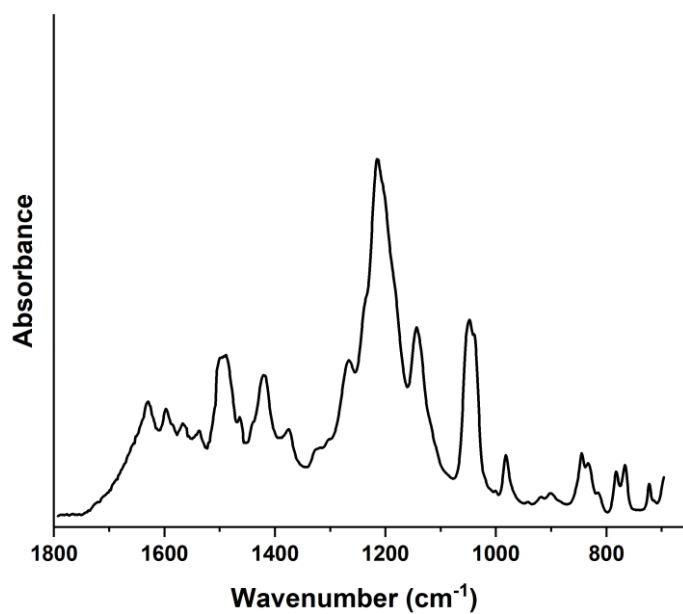

μ-FTIR

Figure S1.36 Violet

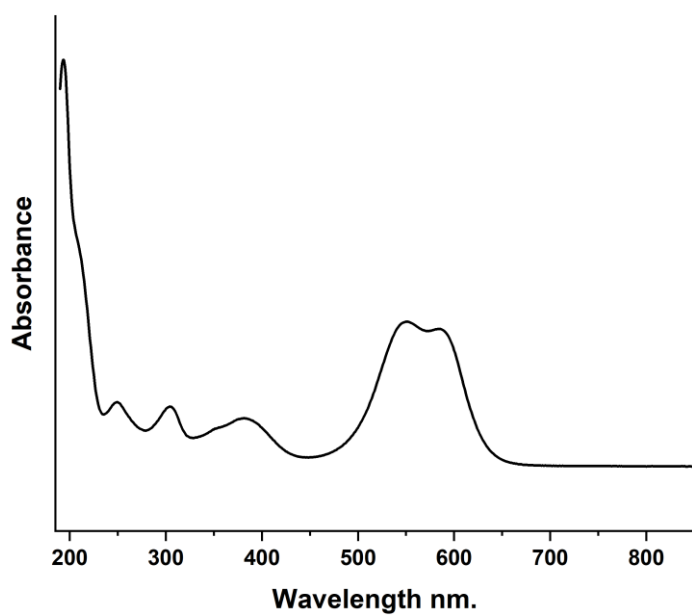

UV-Vis

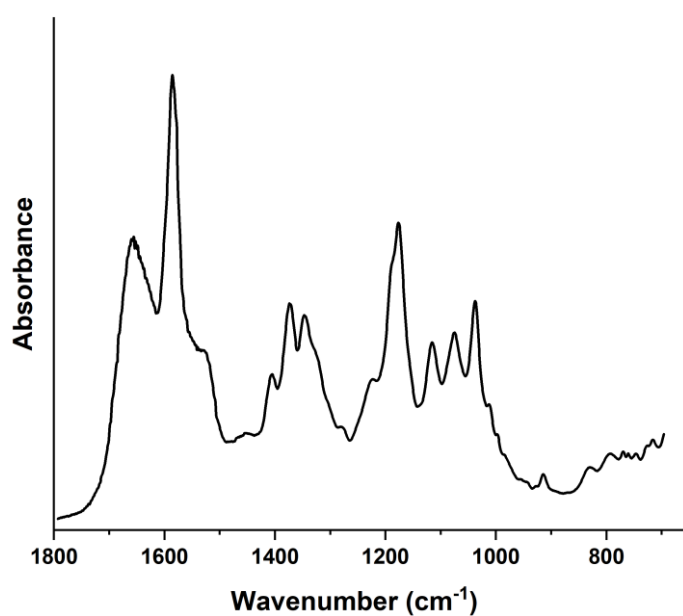

μ-FTIR

Figure S1.37 Viridian

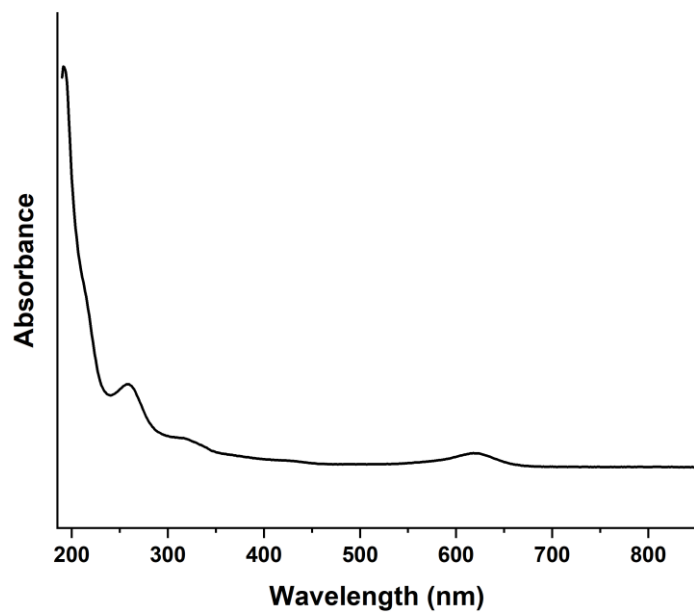

UV-Vis

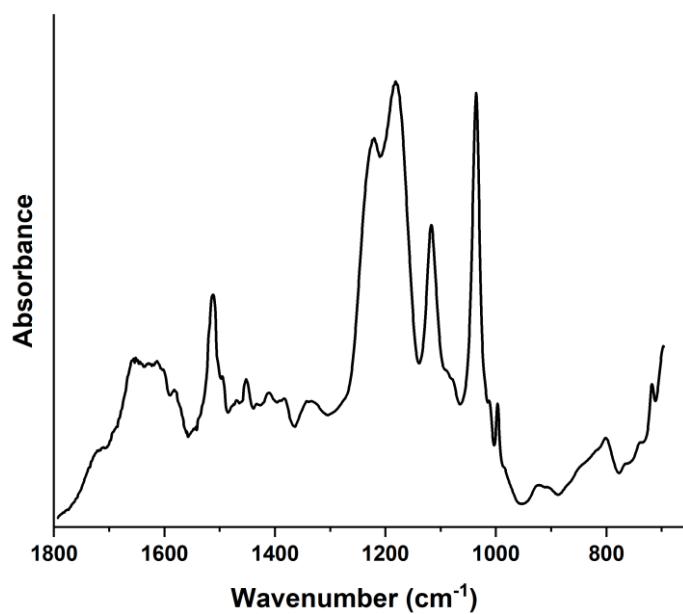

μ-FTIR

Figure S1.38 Yellow Ochre

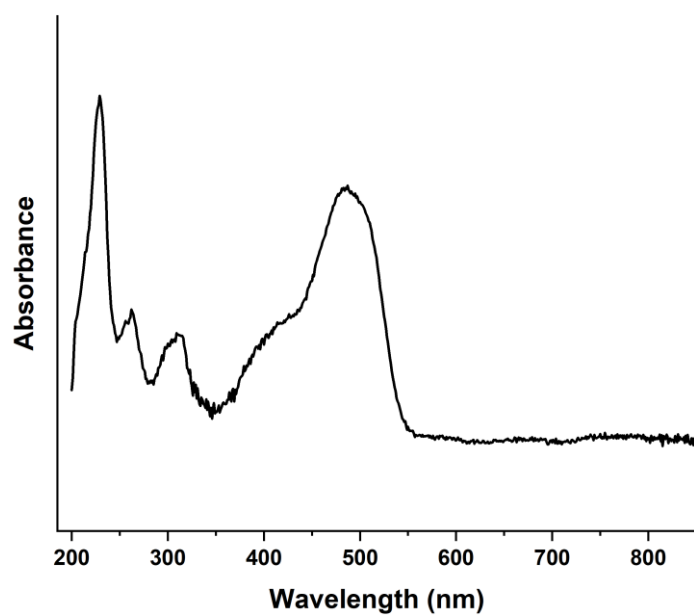

UV-Vis

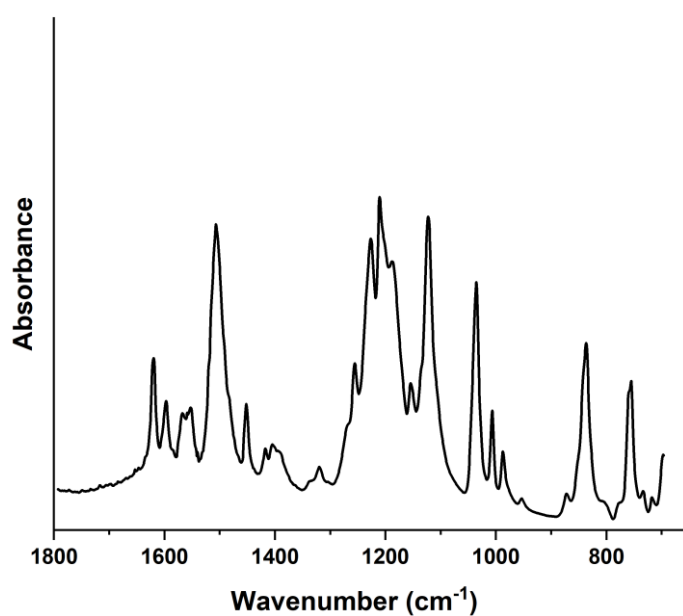

μ-FTIR

Figure S2. TLC Plates  
developed for TLC-SERS

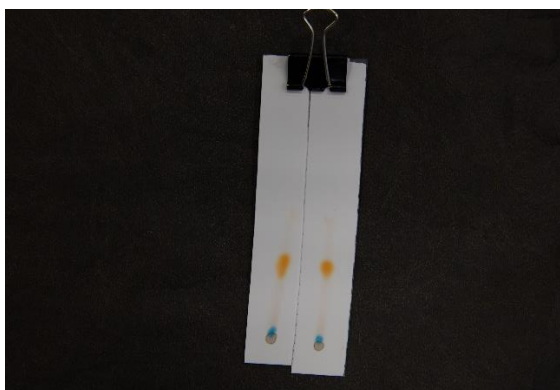

Beige

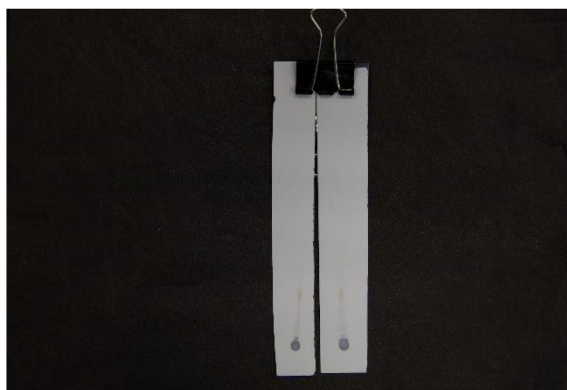

Black

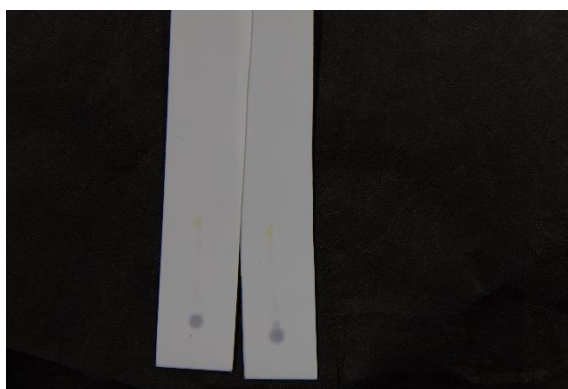

Bluish Black

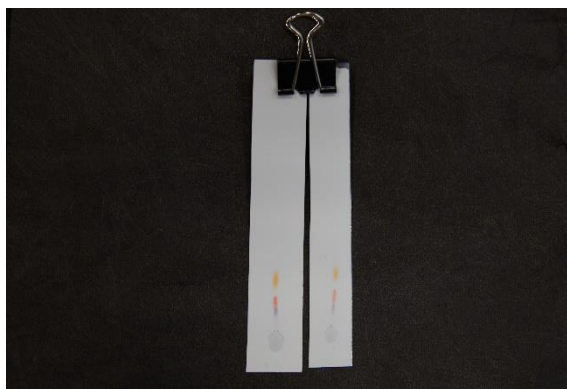

Burnt Sienna

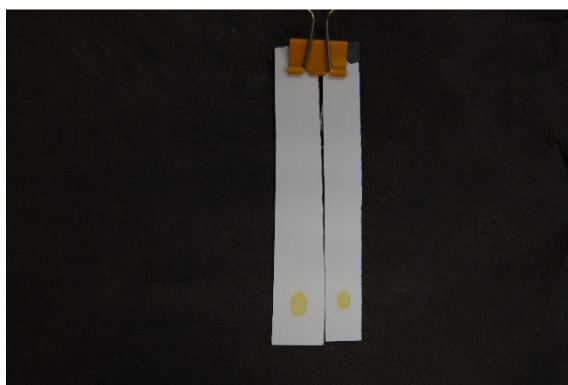

Cadmium

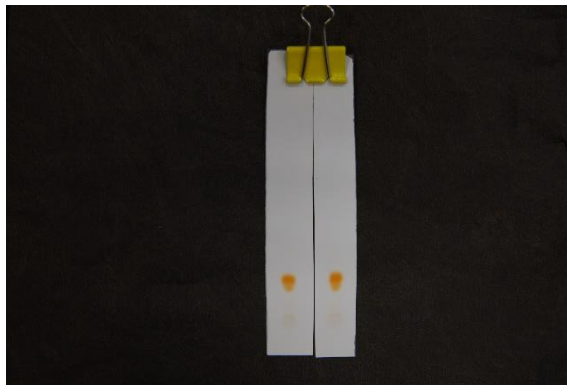

Cadmium Orange

Figure S2. TLC Plates  
developed for TLC-SERS

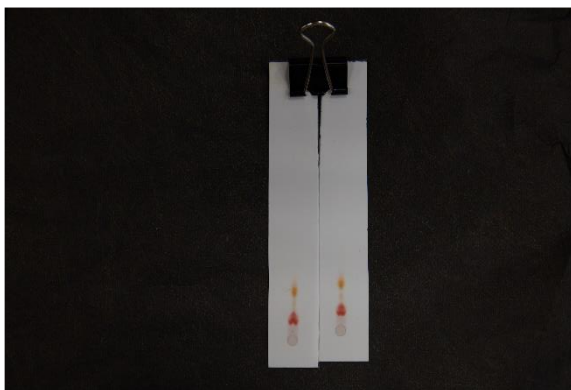

Carmine

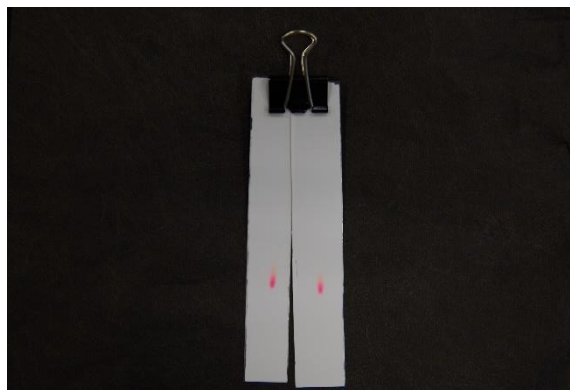

Cerise

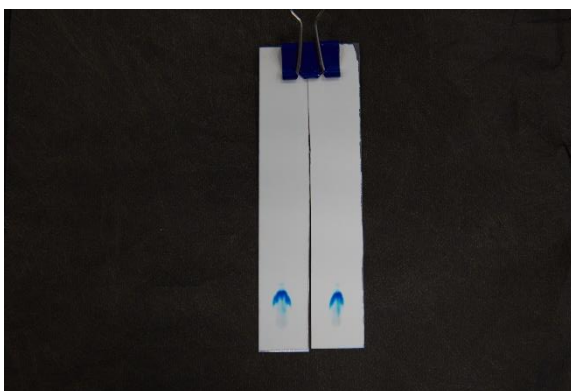

Cerulean

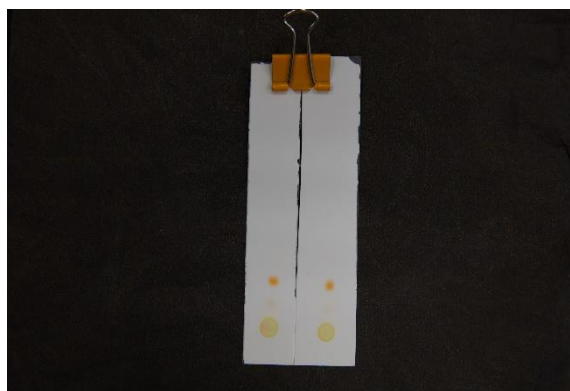

Chrome Yellow

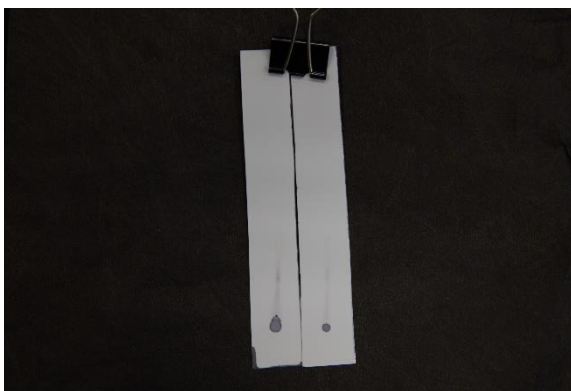

Dark Gray

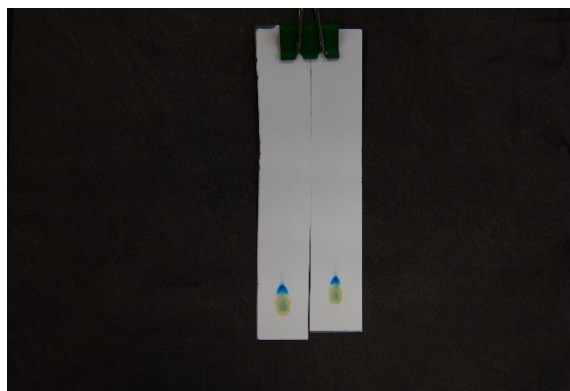

Emerald

Figure S2. TLC Plates  
developed for TLC-SERS

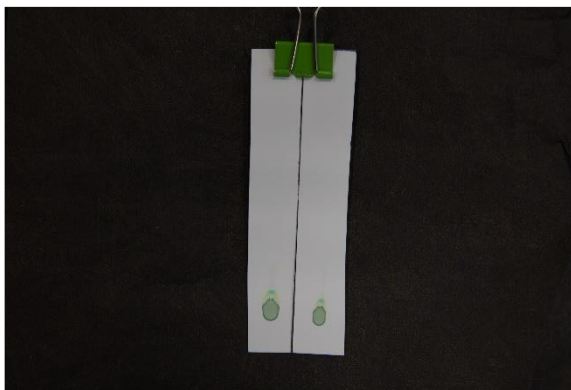

Hooker's Green

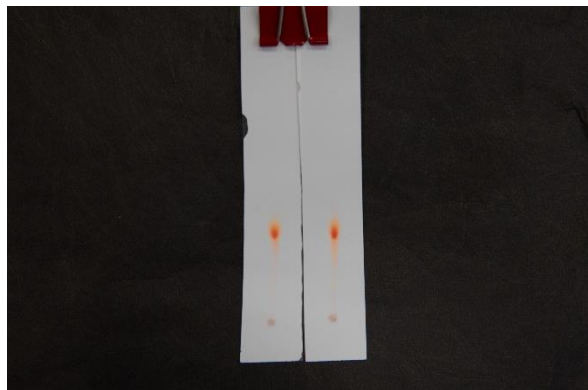

Lake

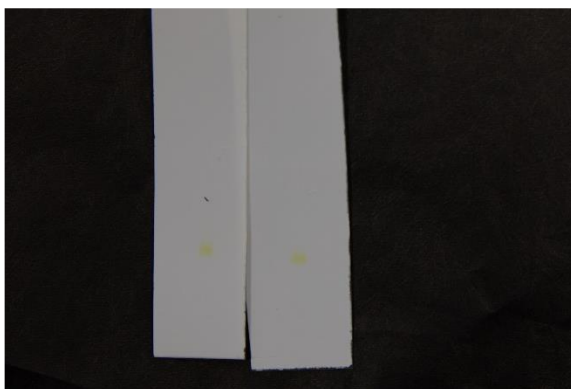

Lemon Yellow

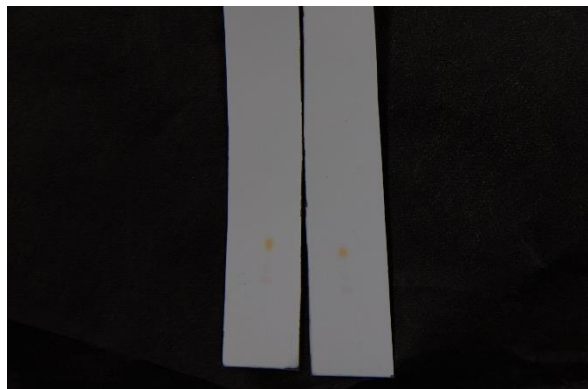

Light Brown

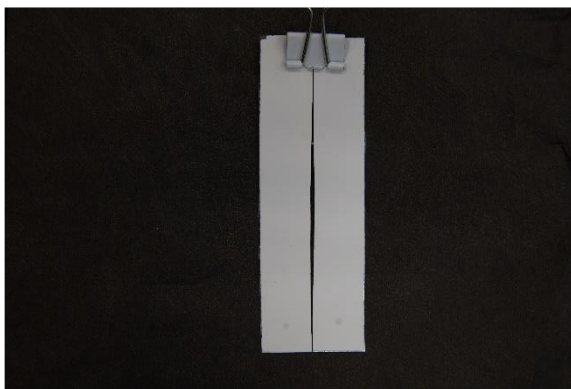

Light Gray

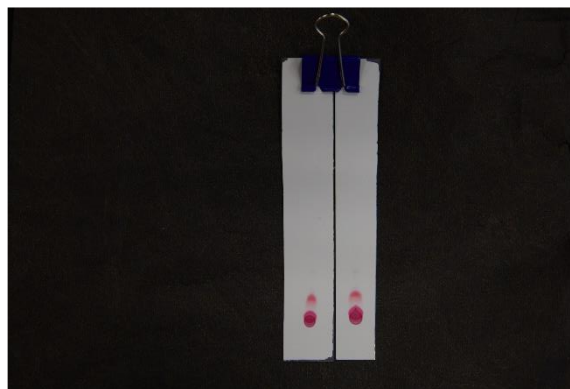

Magenta



Figure S2. TLC Plates  
developed for TLC-SERS

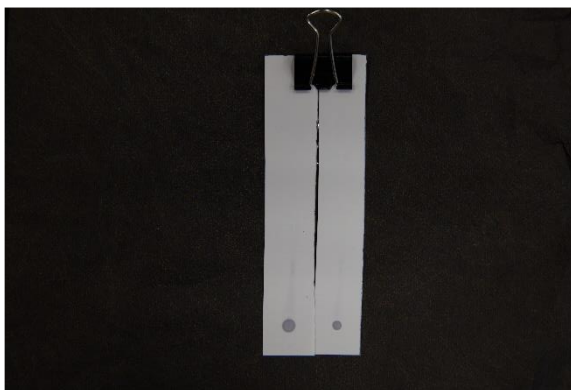

Medium Gray

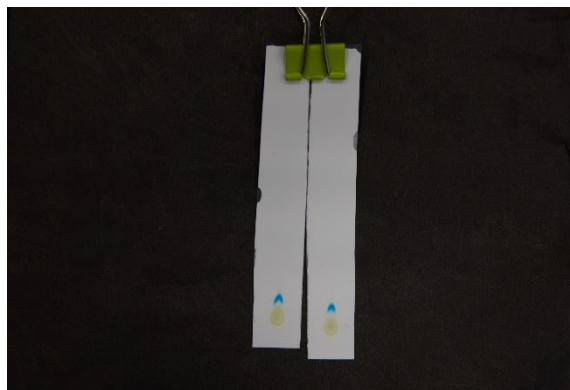

Nile Green

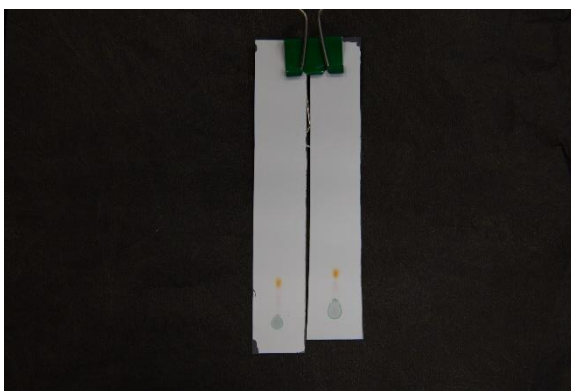

Olive Green

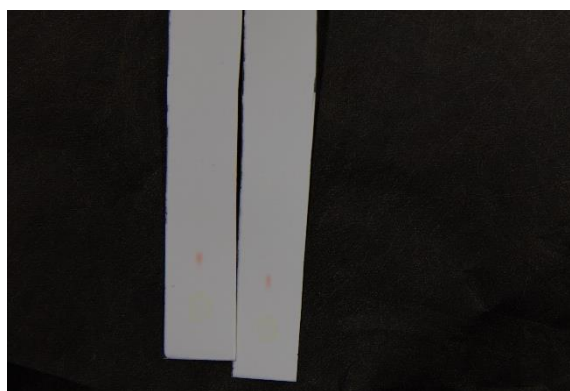

Orange

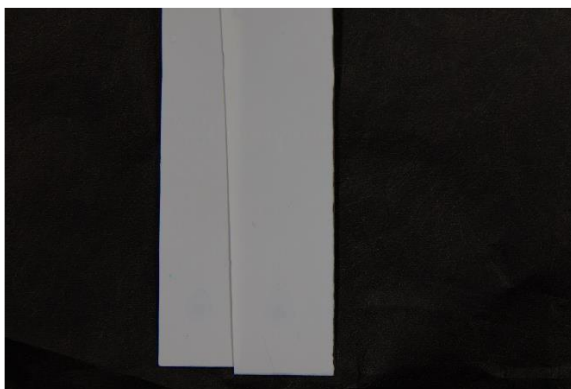

Payne's Gray

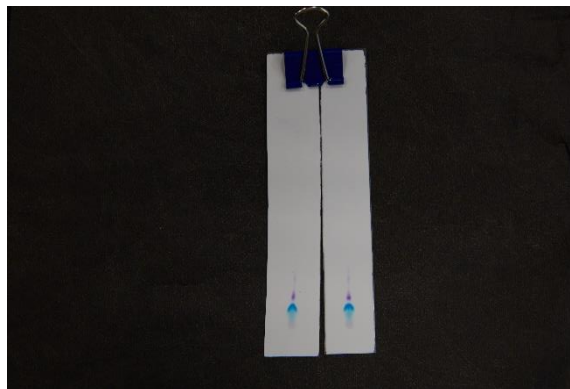

Prussian Blue



Figure S2. TLC Plates  
developed for TLC-SERS

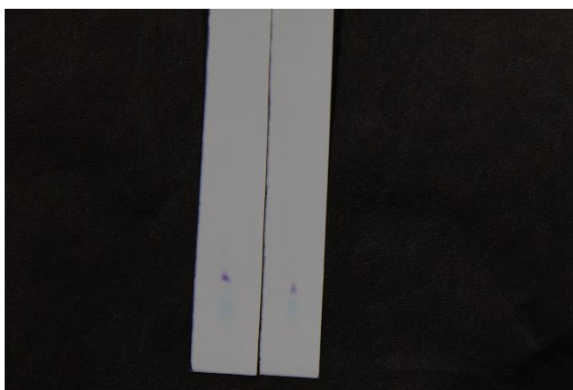

Purple

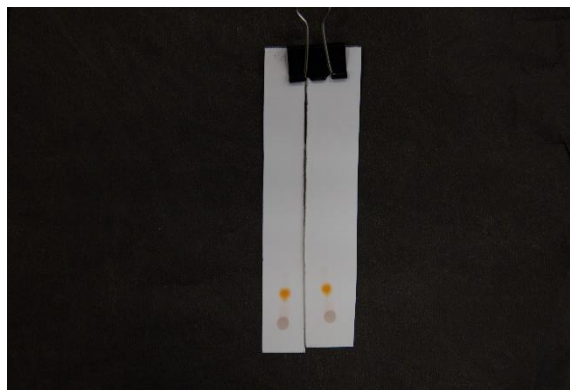

Reddish Brown

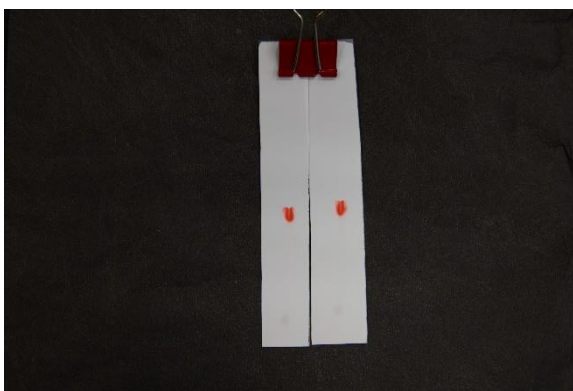

Rose Carthame

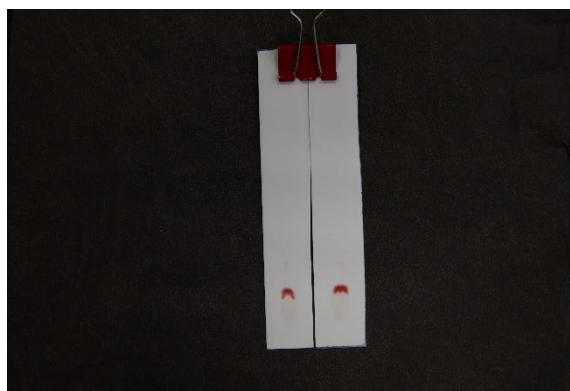

Rose Madder

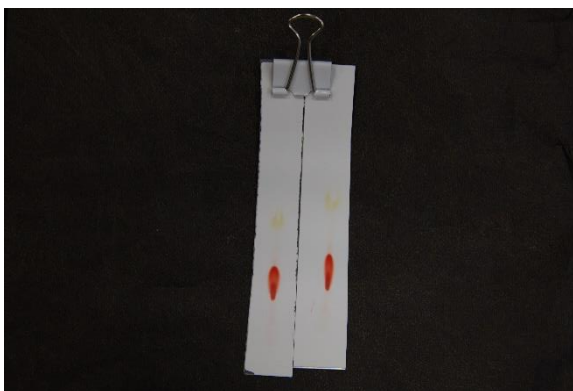

Scarlet

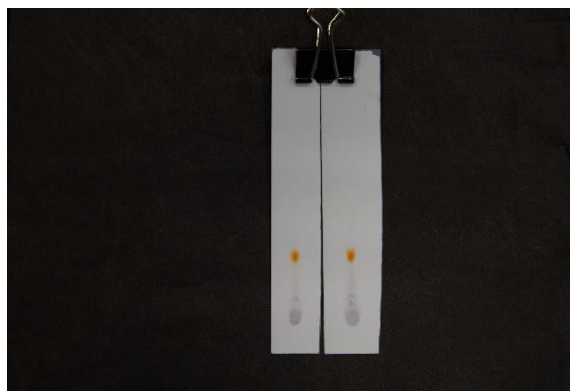

Sepia

Figure S2. TLC Plates  
developed for TLC-SERS

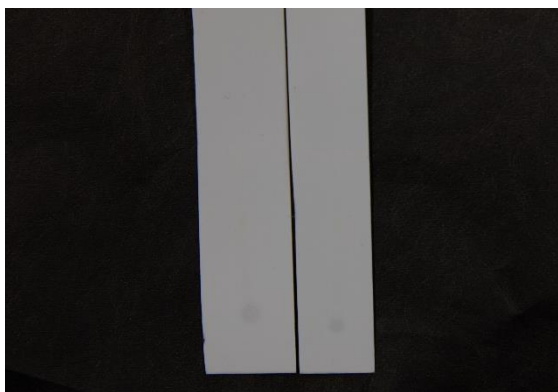

Stone Gray

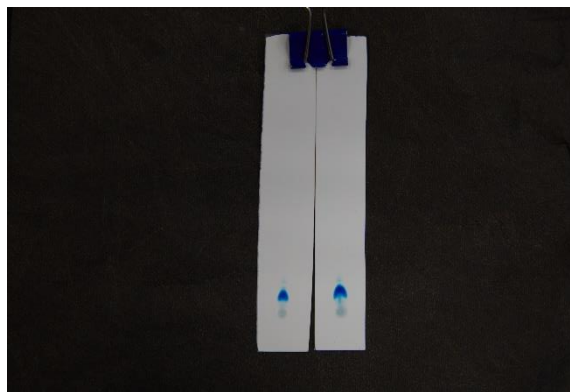

Turquoise

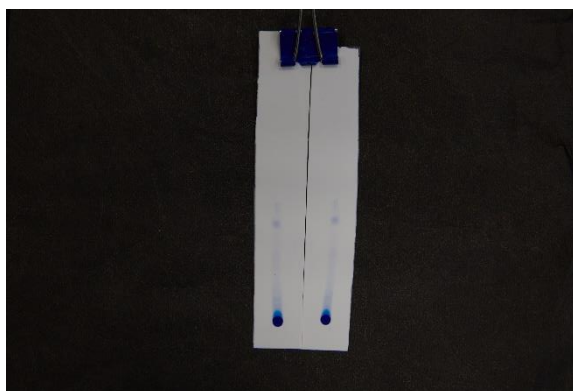

Ultramarine

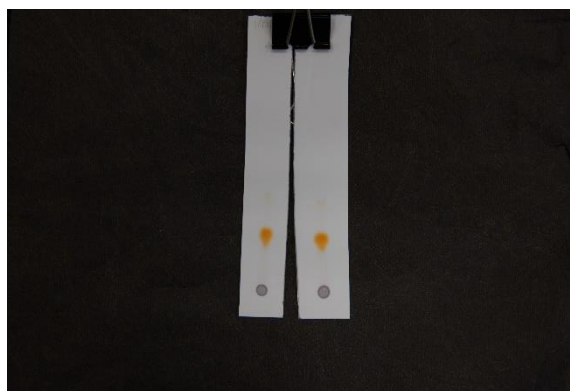

Van Dyke Brown

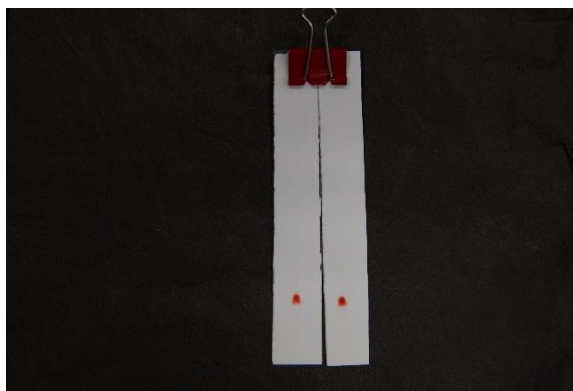

Vermillion

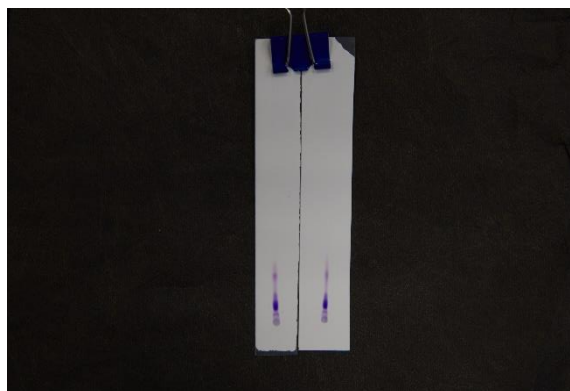

Violet

Figure S2. TLC Plates  
developed for TLC-SERS

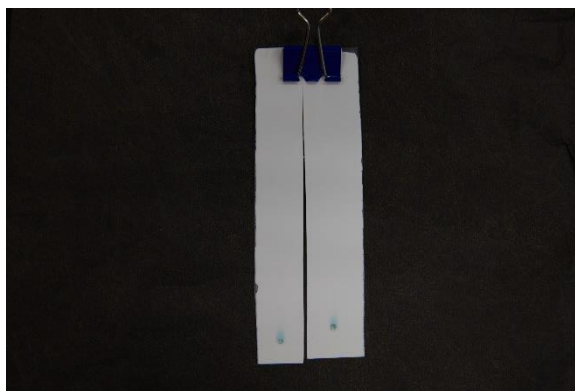

Viridian

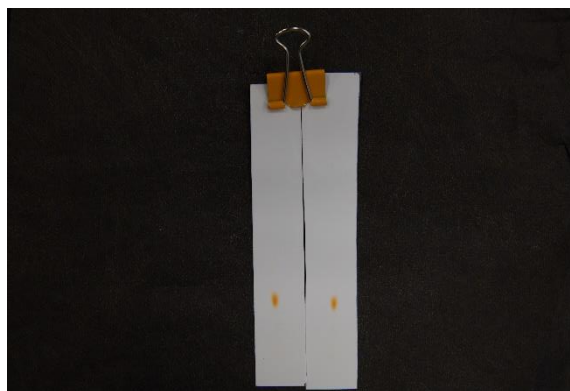

Yellow Ochre

Figure S3.1 Acid Red 17

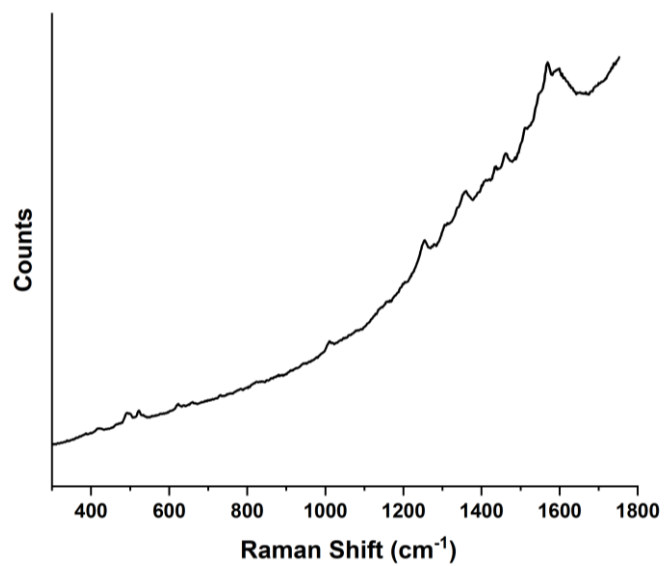

Figure S3.2 Acid Red 73

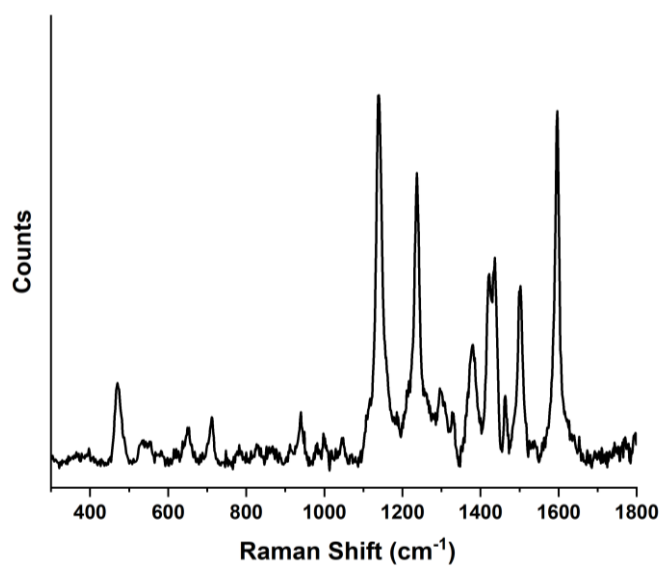

Figure S3.3 Acid Red 87

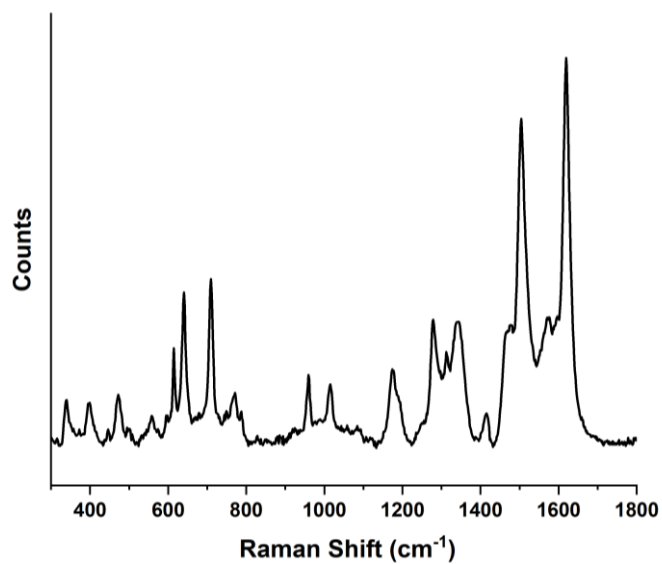

Figure S3.4 Acid Red 103

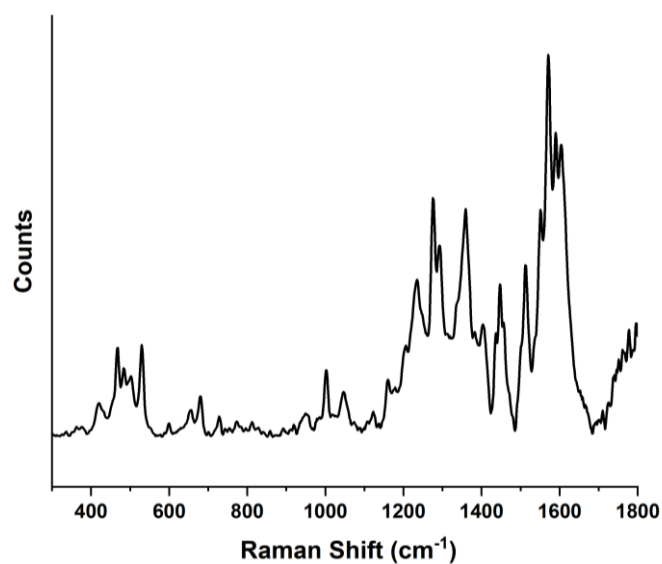

Figure S3.5 Basic Red 1

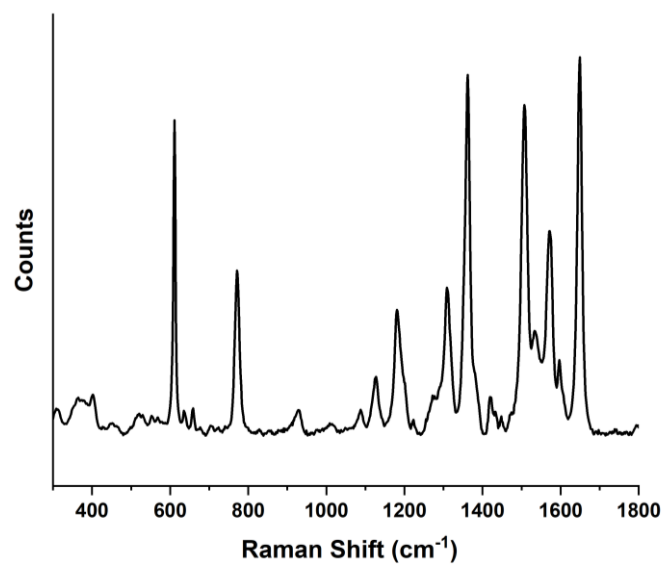

Figure S3.6 Acid Orange 7

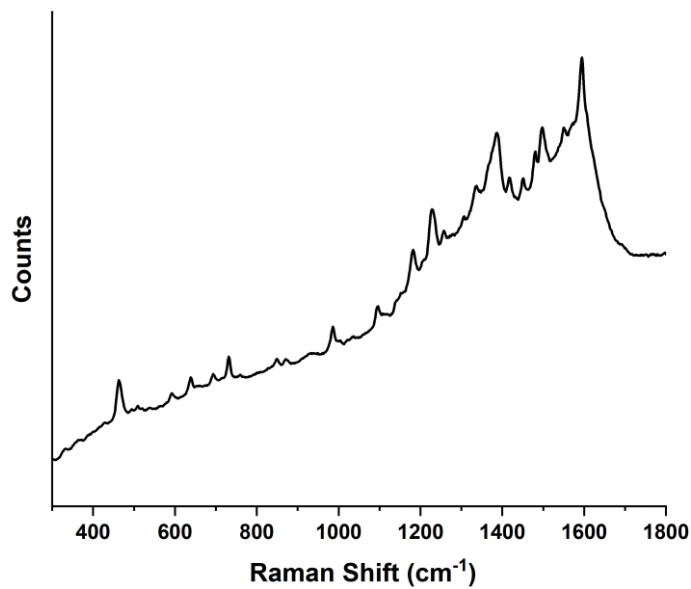

Figure S3.7 Acid Yellow 1 (?)

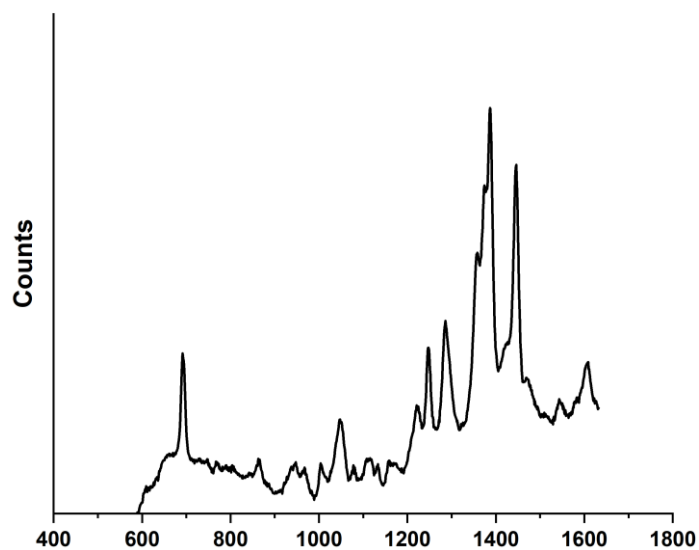

Figure S3.8 Acid Yellow 23

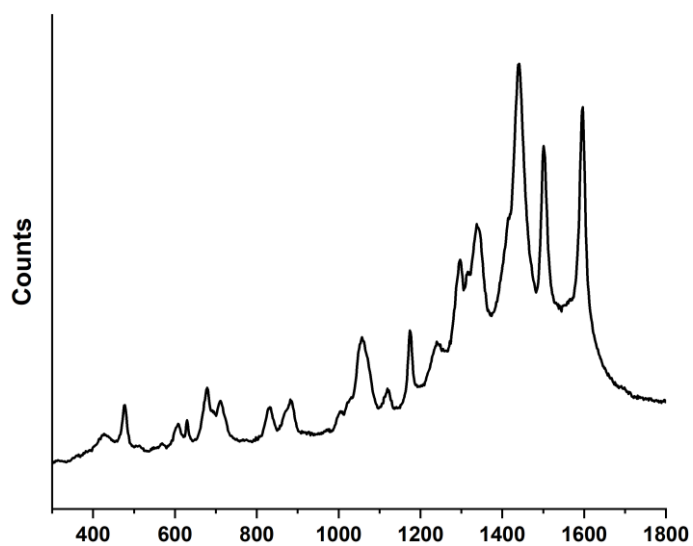

Figure S3.9 Acid Green 1

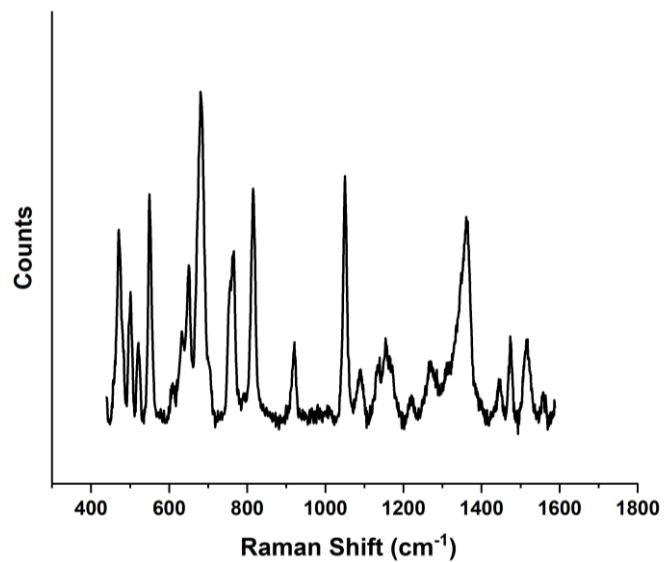

Figure S3.10 Basic Green 4

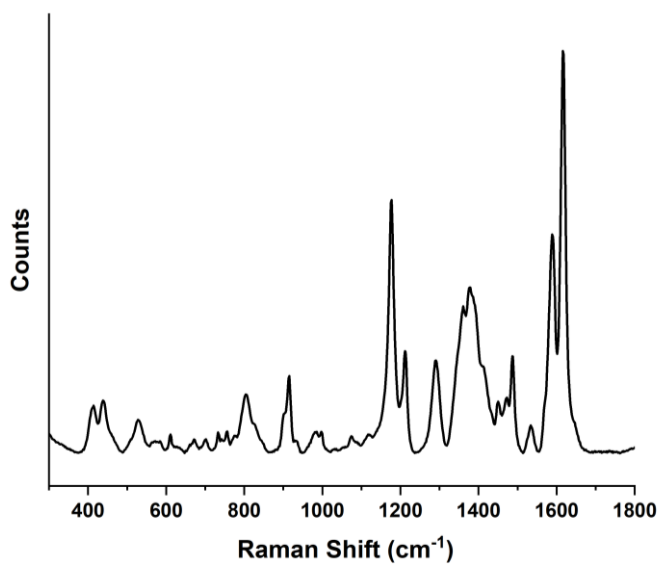

Figure S3.11 Acid Blue 3

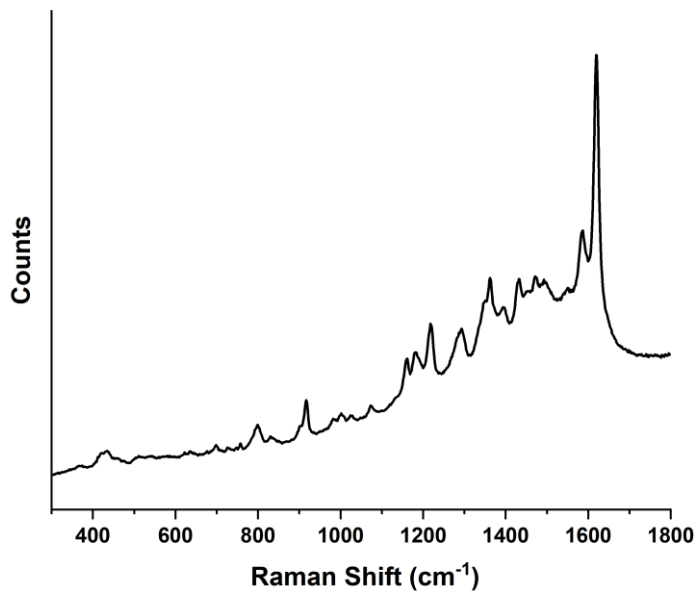

Figure S3.12 Acid Blue 93

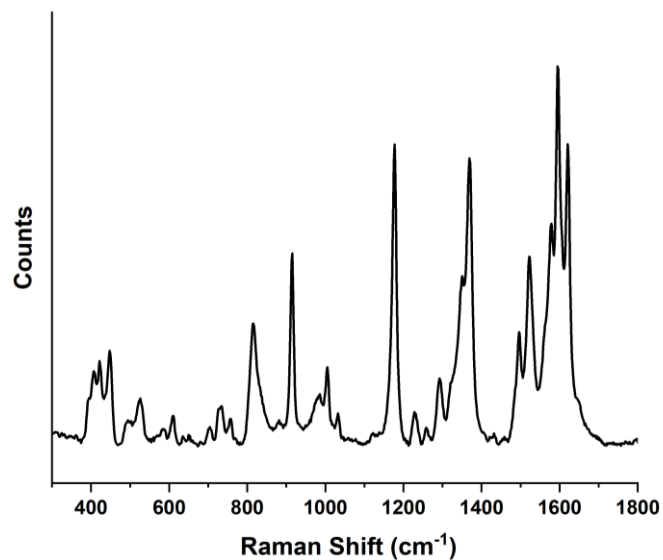

Figure S3.13 Basic Violet 3

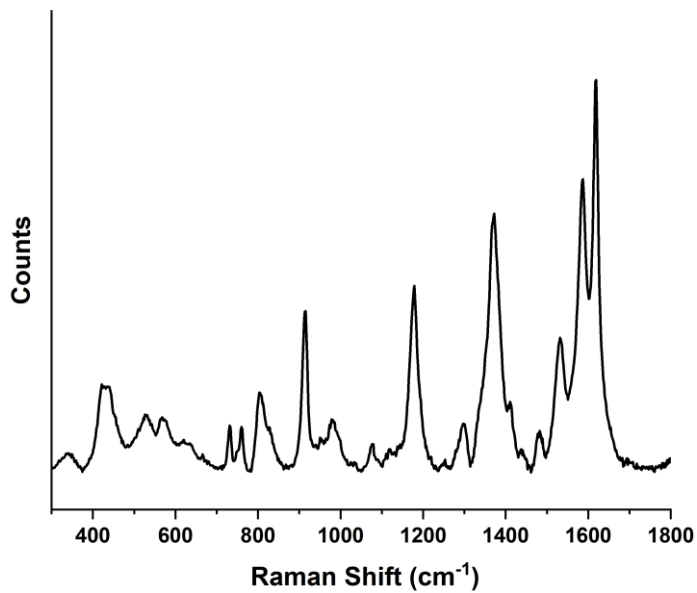

Figure S3.14 Basic Violet 10

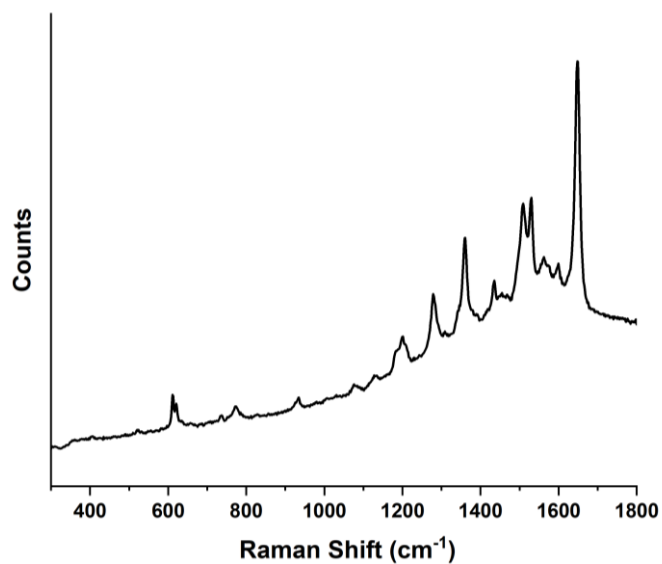

Figure S3.15 Basic Violet 17

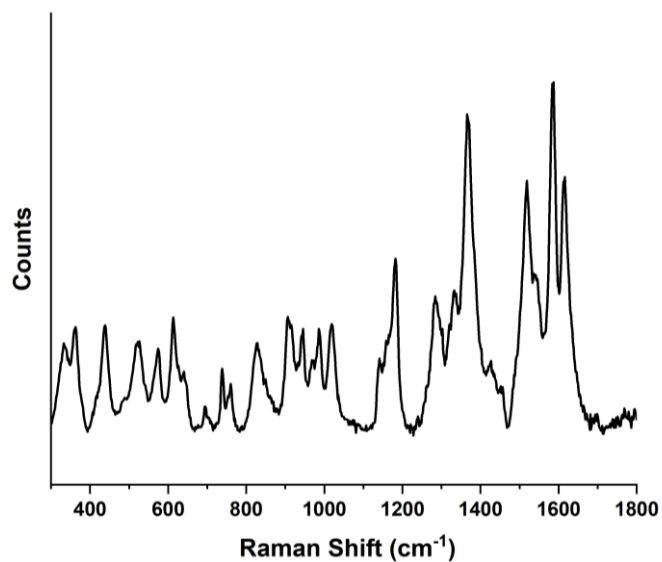

Figure S3.16 Acid Black 2

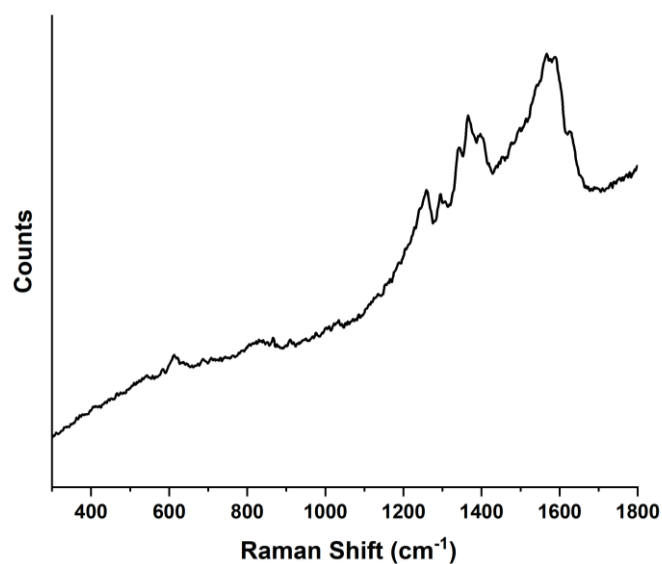

# Figure S4. Dr. Ph. Martin's Synchromatic Transparent Watercolors used in *À la recherche du shoe perdu* (MoMA) by reflectance spectrophotometry

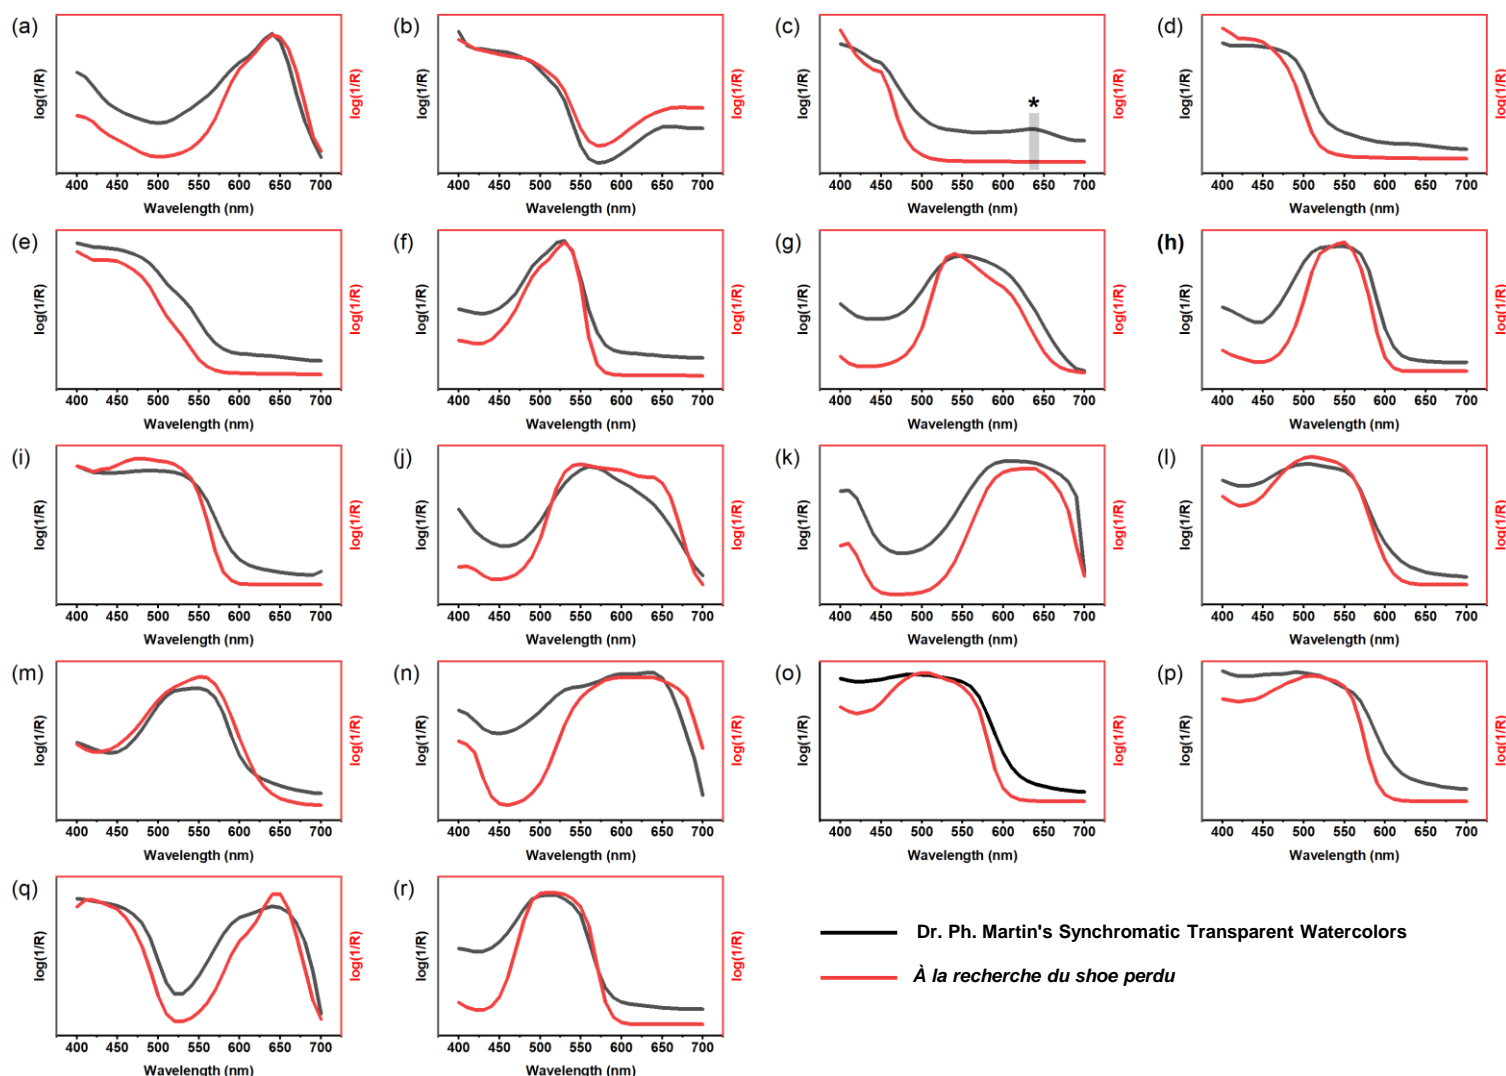

Dr. Ph. Martin's Synchromatic Transparent Watercolors

*À la recherche du shoe perdu* (Plate Numbers)

|   | Dr. Ph. Martin's Synchromatic Transparent Watercolors | <i>À la recherche du shoe perdu</i> (Plate Numbers) |
|---|-------------------------------------------------------|-----------------------------------------------------|
| a | Viridian                                              | 1                                                   |
| b | Olive Green                                           | 13                                                  |
| c | Lemon yellow                                          | 12                                                  |
| d | Cadmium                                               | 17                                                  |
| e | Chrome Yellow                                         | 13                                                  |
| f | Rose Carthame                                         | 3                                                   |
| g | Violet                                                | 15                                                  |
| h | Cerise                                                | 15                                                  |
| i | Orange                                                | 11                                                  |
| j | Purple                                                | 17                                                  |
| k | Cerulean Blue                                         | 7                                                   |
| l | Carmin                                                | 11                                                  |
| m | Magenta                                               | 1                                                   |
| n | Prussian Blue                                         | 9                                                   |
| o | Scarlet                                               | 16                                                  |
| p | Vermilion                                             | 2                                                   |
| q | Nile Green                                            | 9                                                   |
| r | Lake                                                  | 14                                                  |
